# Supplementary material for: A Bioinspired Catalytic Aerobic Oxidative C–H Functionalization of Primary Aliphatic Amines: Synthesis of 1,2-Disubstituted Benzimidazoles
Source: PubMed Central journal article supplement (PMC4557039; doi:10.1002/chem.201502487), 2015-07-23

# CHEMISTRY

## A **European** Journal

### Supporting Information

#### **A Bioinspired Catalytic Aerobic Oxidative C–H Functionalization of Primary Aliphatic Amines: Synthesis of 1,2-Disubstituted Benzimidazoles**

Khac Minh Huy Nguyen and Martine Largeton<sup>\*[a]</sup>

chem\_201502487\_sm\_miscellaneous\_information.pdf

# Supporting Information

## Table of Contents

- I. General considerations
- II. Analytical data for known compounds whose NMR data are not reported
- III. References
- IV. Analytical data for new compounds
- V. High field  $^1\text{H}$  NMR spectra and 1D proton-decoupled  $^{13}\text{C}$  NMR spectra for all compounds **4a-w**

## I. General considerations

$^1\text{H}$  NMR and 1D proton decoupled  $^{13}\text{C}$  NMR spectra were recorded in  $\text{CDCl}_3$  on a Bruker AC-300 spectrometer operating at 300 MHz and 75 MHz, respectively. Chemical shifts  $\delta$  are given in ppm relative to TMS and coupling constants  $J$ , in Hertz. The measurements were carried out using the standard pulse-sequences. The carbon type (methyl, methylene, methine, or quaternary) was determined by DEPT experiments. High-resolution mass spectra (HRMS) were performed on a Bruker maXis mass spectrometer operating in the positive ion mode. Chemicals were commercial products of the highest available purity and were used as supplied.

The following compounds are known with analytical data reported in the literature: benzimidazole **4a**<sup>[1-3]</sup>; benzimidazole **4b**<sup>[2]</sup>; benzimidazole **4d**<sup>[2]</sup>; benzimidazole **4g**<sup>[2]</sup>; benzimidazole **4h**<sup>[2]</sup>; benzimidazole **4k**<sup>[3]</sup>; benzimidazole **4q**<sup>[4]</sup>; benzimidazole **4s**<sup>[5]</sup>; benzimidazole **4t**<sup>[6]</sup>; benzimidazole **4u**<sup>[3]</sup>; benzimidazole **4v**<sup>[7]</sup>

## II. Analytical data for known compounds for which NMR data are not reported

**Benzimidazole 4c.**<sup>[8]</sup>  $^1\text{H}$  NMR (300 MHz,  $\text{CDCl}_3$ , 25°C, TMS):  $\delta$  = 1.35 (s, 9H,  $\text{CH}_3$ ), 7.28 (m, 2H, Ar), 7.35-7.40 (m, 5H, Ar), 7.55-7.58 (m, 5H, Ar), 7.95 (d,  $J$  = 8 Hz, 1H, Ar);  $^{13}\text{C}$  NMR (75 MHz,  $\text{CDCl}_3$ , 25°C, TMS):  $\delta$  = 31.2 (3 x  $\text{CH}_3$ ), 34.8 (Cq), 110.4 (CH, Ar), 119.7 (CH, Ar), 122.9 (CH, Ar), 123.2 (CH, Ar), 125.3 (2 x CH, Ar), 126.9 (Cq), 127.6 (2 x CH, Ar), 128.6 (CH, Ar), 129.1 (2 x CH, Ar), 129.9 (2 x CH, Ar), 137.2 (Cq), 137.3 (Cq), 143.0 (Cq), 152.4 (Cq), 152.7 (Cq); HRMS (ESI+)  $m/z$  calcd for  $\text{C}_{23}\text{H}_{22}\text{N}_2$   $[\text{M}+\text{H}]^+$  327.1856, Found 327.1856.

**Benzimidazole 4e.**<sup>[9]</sup>  $^1\text{H}$  NMR (300 MHz,  $\text{CDCl}_3$ , 25°C, TMS):  $\delta$  = 3.66 (s, 6H, 2 x  $\text{CH}_3$ ), 6.49 (m, 1H, Ar), 6.78 (m, 2H, Ar), 7.26-7.28 (m, 2H, Ar), 7.33-7.36 (m, 3H, Ar), 7.50-7.53 (m, 3H, Ar), 7.95 (d,  $J$  = 8 Hz, 1H, Ar);  $^{13}\text{C}$  NMR (75 MHz,  $\text{CDCl}_3$ , 25°C, TMS):  $\delta$  = 55.3 (2 x  $\text{CH}_3$ ), 102.7 (CH, Ar), 107.2 (2 x CH, Ar), 110.5 (CH, Ar), 119.9 (CH, Ar), 123.1 (CH, Ar), 123.5 (CH, Ar), 127.5 (2 x CH, Ar), 128.6 (CH, Ar), 129.9 (2 x CH, Ar), 131.5, (Cq), 137.1 (Cq), 137.3 (Cq), 142.8 (Cq), 152.1 (Cq), 160.5 (2 x Cq); HRMS (ESI+)  $m/z$  calcd for  $\text{C}_{21}\text{H}_{18}\text{N}_2\text{O}_2$   $[\text{M}+\text{H}]^+$  331.1441, Found 331.1441.

**Benzimidazole 4f.**<sup>[10]</sup>  $^1\text{H}$  NMR (300 MHz,  $\text{CDCl}_3$ , 25°C, TMS):  $\delta$  = 3.65 (m, 2H, NH,  $\text{D}_2\text{O}$  exchanged), 6.60 (d,  $J$  = 8.55 Hz, 2H, Ar), 7.25-7.43 (m, 7H, Ar), 7.53-7.56 (m, 3H, Ar), 7.90 (d,  $J$  = 7.9 Hz, 1H, Ar);  $^{13}\text{C}$  NMR (75 MHz,  $\text{CDCl}_3$ , 25°C, TMS):  $\delta$  = 110.5 (CH, Ar), 115.4 (CH, Ar), 115.7 (CH, Ar), 119.8 (CH, Ar), 123.2 (CH, Ar), 123.5 (CH, Ar), 126.09 (CH, Ar), 126.13 (CH, Ar), 127.4 (CH, Ar), 128.8 (CH, Ar), 130.0 (CH, Ar), 131.4 (CH, Ar), 131.5 (CH, Ar), 136.8 (Cq), 137.2 (Cq), 142.8 (Cq), 151.4

(Cq), 161.8 (Cq), 165.1 (Cq); HRMS (ESI+)  $m/z$  calcd for  $C_{19}H_{15}N_3$   $[M+H]^+$  286.1344, Found 286.1347.

**Benzimidazole 4j.**<sup>[9]</sup>  $^1H$  NMR (300 MHz,  $CDCl_3$ , 25°C, TMS):  $\delta$  = 7.23-7.55 (m, 12H, Ar), 7.89-7.94 (m, 2H, Ar), 8.05 (d,  $J$  = 8.7 Hz, 1H, Ar), 8.18 (m, 1H, Ar);  $^{13}C$  NMR (75 MHz,  $CDCl_3$ , 25°C, TMS):  $\delta$  = 110.7 (CH, Ar), 120.2 (CH, Ar), 123.1 (CH, Ar), 123.5 (CH, Ar), 124.6 (CH, Ar), 125.9 (CH, Ar), 126.3 (CH, Ar), 126.5 (2 x CH, Ar), 126.7 (CH, Ar), 127.7 (Cq), 128.1 (CH, Ar), 128.3 (CH, Ar), 129.5 (3 x CH, Ar), 130.0 (CH, Ar), 132.2 (Cq), 133.6 (Cq), 136.1 (Cq), 136.4 (Cq), 143.2 (Cq), 151.9 (Cq); HRMS (ESI+)  $m/z$  calcd for  $C_{23}H_{16}N_2$   $[M+H]^+$  321.1386, Found 321.1387.

**Benzimidazole 4l.**<sup>[11]</sup>  $^1H$  NMR (300 MHz,  $CDCl_3$ , 25°C, TMS):  $\delta$  = 6.21 (d,  $J$  = 3.4 Hz, 1H, furyl), 6.4 (m, 1H, furyl), 7.13 (d,  $J$  = 7.8 Hz, 1H, furyl), 7.25-7.40 (m, 2H, Ar), 7.44-7.47 (m, 2H, Ar), 7.52-7.53 (m, 1H, Ar), 7.62-7.63 (m, 3H, Ar), 7.92 (d,  $J$  = 8.0 Hz, 1H, Ar);  $^{13}C$  NMR (75 MHz,  $CDCl_3$ , 25°C, TMS):  $\delta$  = 110.2 (CH, Ar), 111.5 (CH, Ar), 112.2 (CH, Ar), 119.9 (CH, Ar), 123.1 (CH, Ar), 123.6 (CH, Ar), 128.0 (2 x CH, Ar), 129.5 (CH, Ar), 130.0 (2 x CH, Ar), 136.4 (Cq), 137.2 (Cq), 142.9 (Cq), 144.2 (2 x CH, Ar), 144.5 (Cq); HRMS (ESI+)  $m/z$  calcd for  $C_{17}H_{12}N_2O$   $[M+H]^+$  261.1028, Found 261.1035.

**Benzimidazole 4m.**<sup>[12]</sup>  $^1H$  NMR (300 MHz,  $CDCl_3$ , 25°C, TMS):  $\delta$  = 1.22-1.97 (m, 10H, cyclohexyl), 2.73-2.78 (m, 1H, cyclohexyl), 7.10 (d,  $J$  = 8 Hz, 1H, Ar), 7.22 (t,  $J$  = 8 Hz, 1H, Ar), 7.31 (d,  $J$  = 8 Hz, 1H, CH, Ar), 7.40 (m, 2H, Ar), 7.61-7.64 (m, 3H, Ar), 7.86 (d,  $J$  = 7.9 Hz, 1H, Ar);  $^{13}C$  NMR (75 MHz,  $CDCl_3$ , 25°C, TMS):  $\delta$  = 25.7 ( $CH_2$ ), 26.2 (2 x  $CH_2$ ), 32.0 (2 x  $CH_2$ ), 36.2 (CH), 110.1 (CH, Ar), 119.1 (CH, Ar), 122.4 (CH, Ar), 122.5 (CH, Ar), 127.6 (2 x CH, Ar), 129.0 (CH, Ar), 130.0 (2 x CH, Ar), 136.0 (Cq), 136.4 (Cq), 142.3 (Cq), 159.3 (Cq); HRMS (ESI+)  $m/z$  calcd for  $C_{19}H_{20}N_2$   $[M+H]^+$  277.1705, Found 277.1693.

**Benzimidazole 4n.**<sup>[13]</sup>  $^1H$  NMR (300 MHz,  $CDCl_3$ , 25°C, TMS):  $\delta$  = 1.05-1.10 (m, 2H, cyclopropyl), 1.37-1.40 (m, 2H, cyclopropyl), 1.90 (m, 1H, cyclopropyl), 7.18-7.20 (m, 2H, Ar), 7.25-7.29 (m, 1H, Ar), 7.50-7.54 (m, 3H, Ar), 7.60-7.62 (m, 2H, Ar), 7.77 (d,  $J$  = 7.9 Hz, 1H, Ar);  $^{13}C$  NMR (75 MHz,  $CDCl_3$ , 25°C, TMS):  $\delta$  = 8.3 (CH), 9.6 (2 x  $CH_2$ ), 109.7 (CH, Ar), 118.8 (CH, Ar), 122.2 (CH, Ar), 122.4 (CH, Ar), 127.4 (2 x CH, Ar), 128.7 (CH, Ar), 129.9 (2 x CH, Ar), 136.0 (Cq), 136.5 (Cq), 142.4 (Cq), 156.9 (Cq); HRMS (ESI+)  $m/z$  calcd for  $C_{16}H_{14}N_2$   $[M+H]^+$  235.1235, Found 235.1228.

### III. References

- [1] H. Baars, A. Beyer, S. V. Kohlhepp, C. Bolm, *Org. Lett.* **2014**, *16*, 536-539.
- [2] J. Jayabharathi, V. Thanikachalam, K. Jayamoorthy, *Photochem. Photobiol. Sci.* **2013**, *12*, 1761-1773.
- [3] D. Zhao, J. Hu, N. Wu, X. Huang, X. Qin, J. Lan, J. You, *Org. Lett.* **2011**, *13*, 6516-6519.
- [4] P. Saha, Md Ashif Ali, P. Ghosh, T. Punniyamurthy, *Org. Biomol. Chem.* **2010**, *8*, 5692-5699.

- [5] G. Brasche, S. L. Buchwald, N. Zheng, K. W. Anderson, X. Huang, H. N. Nguyen, S. L. Buchwald, *Angew. Chem. Int. Ed.* **2007**, *46*, 7509-7512; *Angew. Chem.* **2007**, *119*, 7653-7656.
- [6] T. B. Nguyen, L. Ermolenko, W. A. Dean, A. Al-Mourabit, *Org. Lett.* **2012**, *14*, 5948-5951.
- [7] R. Murakami, K. Tsunoda, T. Iwai, M. Sawamura, *Chem. Eur. J.*, **2014**, *20*, 13127-13131.
- [8] J. Shi, E. Forsythe, D. C. Morton, US Patent US2013/172570 A1, **2013**.
- [9] Eli Lilly and Company, WO1997/33873 A1; US Patent US6025379 A1, **2000**.
- [10] Yu. F. Milyaev, S. A. Khorishko, L. N. Balyatinskaya, *J. Gen. Chem. USSR (Engl. Transl.)*, **1981**, *51*, 168-171 and 192-196.
- [11] D. Secci, A. Bolasco, M. D'Ascenzio, F. della Sala, M. Yanez, S. Carradori, *J. Heterocyclic Chem.* **2012**, *49*, 1187-1195.
- [12] S. Iyengar, M.A. Mulhauser, K.B. Thor, PCT Int. Appl. (1977), WO 9733873 A1, **1997**
- [13] A. Spencer, *J. Organomet. Chem.*, **1985**, *295*, 79-89.

#### IV. Analytical data for new compounds

**Benzimidazole 4i.** Colorless crystal (recrystallized from petroleum ether) m.p. 120-124°C; <sup>1</sup>H NMR (300 MHz, CDCl<sub>3</sub>, 25°C, TMS): δ = 7.28-7.35 (m, 3H, Ar), 7.41-7.53 (m, 8H, Ar), 7.98 (d, *J* = 9.0 Hz, 1H, Ar); <sup>13</sup>C NMR (75 MHz, CDCl<sub>3</sub>, 25°C, TMS): δ = 110.7 (CH, Ar), 120.3 (CH, Ar), 123.2 (CH, Ar), 123.9 (CH, Ar), 126.6 (2 x CH, Ar), 127.2 (CH, Ar), 128.4 (CH, Ar), 128.8 (CH, Ar), 129.6 (2 x CH, Ar), 129.8 (CH, Ar), 133.3 (Cq), 135.0 (Cq), 135.8 (Cq), 135.9 (Cq), 136.5 (Cq), 142.8 (Cq), 149.4 (Cq); HRMS (ESI+) *m/z* calcd for C<sub>19</sub>H<sub>12</sub>Cl<sub>2</sub>N<sub>2</sub> [M+H]<sup>+</sup> 339.0450. Found 339.0450.

**Benzimidazole 4o.** Colorless crystal (recrystallized from petroleum ether): m.p. 80-84°C; <sup>1</sup>H NMR (300 MHz, CDCl<sub>3</sub>, 25°C, TMS): δ = 3.10-3.30 (m, 4H, 2 x CH<sub>2</sub>), 7.13-7.36 (m, 10H, Ar), 7.57 (m, 3H, Ar), 7.88 (d, *J* = 7.9 Hz, 1H, Ar); <sup>13</sup>C NMR (75 MHz, CDCl<sub>3</sub>, 25°C, TMS): δ = 29.8 (CH<sub>2</sub>), 34.2 (CH<sub>2</sub>), 110.2 (CH, Ar), 119.1 (CH, Ar), 122.6 (CH, Ar), 122.8 (CH, Ar), 126.3 (CH, Ar), 127.4 (2 x CH, Ar), 128.4 (2 x CH, Ar), 128.5 (2 x CH, Ar), 129.0 (CH, Ar), 129.9 (2 x CH, Ar), 135.7 (Cq), 136.4 (Cq), 140.8 (Cq), 142.2 (Cq), 154.3 (Cq); HRMS (ESI+) *m/z* calcd for C<sub>21</sub>H<sub>18</sub>N<sub>2</sub> [M+H]<sup>+</sup> 299.1548. Found 299.1548.

**Benzimidazole 4p.** Pale yellow oil: <sup>1</sup>H NMR (300 MHz, CDCl<sub>3</sub>, 25°C, TMS): δ = 0.85-0.89 (t, *J* = 7.0 Hz, 3H, *n*-octyl), 1.25-1.40 (m, 8H, *n*-octyl), 1.76-7.86 (m, 2H, *n*-octyl), 2.78-2.83 (t, *J* = 7.0 Hz, 2H, *n*-octyl), 7.10 (d, *J* = 7.5 Hz, 1H, Ar), 7.20 (t, *J* = 7.5 Hz, 1H, Ar), 7.3 (t, *J* = 7.0 Hz, 1H, Ar), 7.36 (d, *J* = 7 Hz, 2H, Ar), 7.57 (m, 3H, Ar), 7.82 (d, *J* = 7.0 Hz, 1H, Ar); <sup>13</sup>C NMR (75 MHz, CDCl<sub>3</sub>, 25°C, TMS): δ = 14.1 (CH<sub>3</sub>), 22.6 (CH<sub>2</sub>), 27.7 (CH<sub>2</sub>), 27.8 (CH<sub>2</sub>), 28.9 (CH<sub>2</sub>), 29.3 (CH<sub>2</sub>), 31.6 (CH<sub>2</sub>), 109.9 (CH, Ar), 119.1 (CH, Ar), 122.3 (CH, Ar), 122.5 (CH, Ar), 127.4 (2 x CH, Ar), 128.9 (CH, Ar), 129.9 (2 x CH, Ar), 136.1 (Cq), 136.5 (Cq), 142.6 (Cq), 155.4 (Cq); HRMS (ESI+) *m/z* calcd for C<sub>20</sub>H<sub>24</sub>N<sub>2</sub> [M+H]<sup>+</sup> 293.2018. Found 293.2018.

**Benzimidazole 4r.** Colorless crystal (recrystallized from petroleum ether) : m.p. 120-124°C, <sup>1</sup>H NMR (300 MHz, CDCl<sub>3</sub>, 25°C, TMS): δ = 0.96 (d, *J* = 6.6 Hz, 6H, isobutyl),

2.20-2.29 (m, 1H, isobutyl), 2.73-2.76 (d,  $J = 6.6$  Hz, 2H, isobutyl), 7.15 (d,  $J = 7.9$  Hz, 1H, Ar), 7.25 (t,  $J = 7.1$  Hz, 1H, CH, Ar), 7.35 (m, 1H, Ar), 7.4 (d,  $J = 7.1$  Hz, 2H, Ar), 7.58-7.64 (m, 3H, Ar), 7.85 (d,  $J = 7.9$  Hz, 1H, Ar) ;  $^{13}\text{C}$  NMR (75 MHz,  $\text{CDCl}_3$ ,  $25^\circ\text{C}$ , TMS):  $\delta = 22.5$  (2 x  $\text{CH}_3$ ) , 28.0 (CH, isobutyl), 36.4 ( $\text{CH}_2$ ), 110.1 (CH, Ar), 119.0 (CH, Ar), 122.5 (CH, Ar), 122.7 (CH, Ar), 127.6 (2 x CH, Ar), 129.0 (CH, Ar), 130.0 (2 x CH, Ar), 136.0 (Cq), 136.4 (Cq), 142.1 (Cq), 154.6 (Cq); HRMS (ESI+)  $m/z$  calcd for  $\text{C}_{17}\text{H}_{18}\text{N}_2$   $[\text{M}+\text{H}]^+$  251.1548. Found 251.1560.

**Benzimidazole 4w.** Colorless crystal (recrystallized from petroleum ether) : mp  $92-96^\circ\text{C}$   $^1\text{H}$  NMR (300 MHz,  $\text{CDCl}_3$ ,  $25^\circ\text{C}$ , TMS):  $\delta = 1.04-1.10$  (m, 2H, cyclopropyl), 1.34-1.39 (m, 2H, cyclopropyl), 1.85 (m, 1H, cyclopropyl), 7.12-7.30 (m, 3H, Ar), 7.45 (d,  $J = 8.6$  Hz, 2H, Ar), 7.58 (d,  $J = 8.6$  Hz, 2H, Ar), 7.75 (d,  $J = 7.9$  Hz, 1H, Ar) ;  $^{13}\text{C}$  NMR (75 MHz,  $\text{CDCl}_3$ ,  $25^\circ\text{C}$ , TMS):  $\delta = 8.3$  (CH), 9.7 (2 x  $\text{CH}_2$ ), 109.4 (CH, Ar), 119.0 (CH, Ar), 122.5 (CH, Ar), 122.7 (CH, Ar), 128.6 (2 x CH, Ar), 130.1 (2 x CH, Ar), 134.52 (Cq), 134.55 (Cq), 136.3 (Cq), 142.4 (Cq), 156.6 (Cq); HRMS (ESI+)  $m/z$  calcd for  $\text{C}_{16}\text{H}_{13}\text{ClN}_2$   $[\text{M}+\text{H}]^+$  269.0846. Found 269.0841.

**V.High field  $^1\text{H}$  NMR spectra and 1D proton-decoupled  $^{13}\text{C}$  NMR spectra for all compounds 4a-w (see next page)**

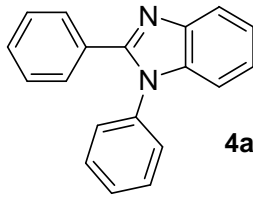

1D proton NMR spectrum

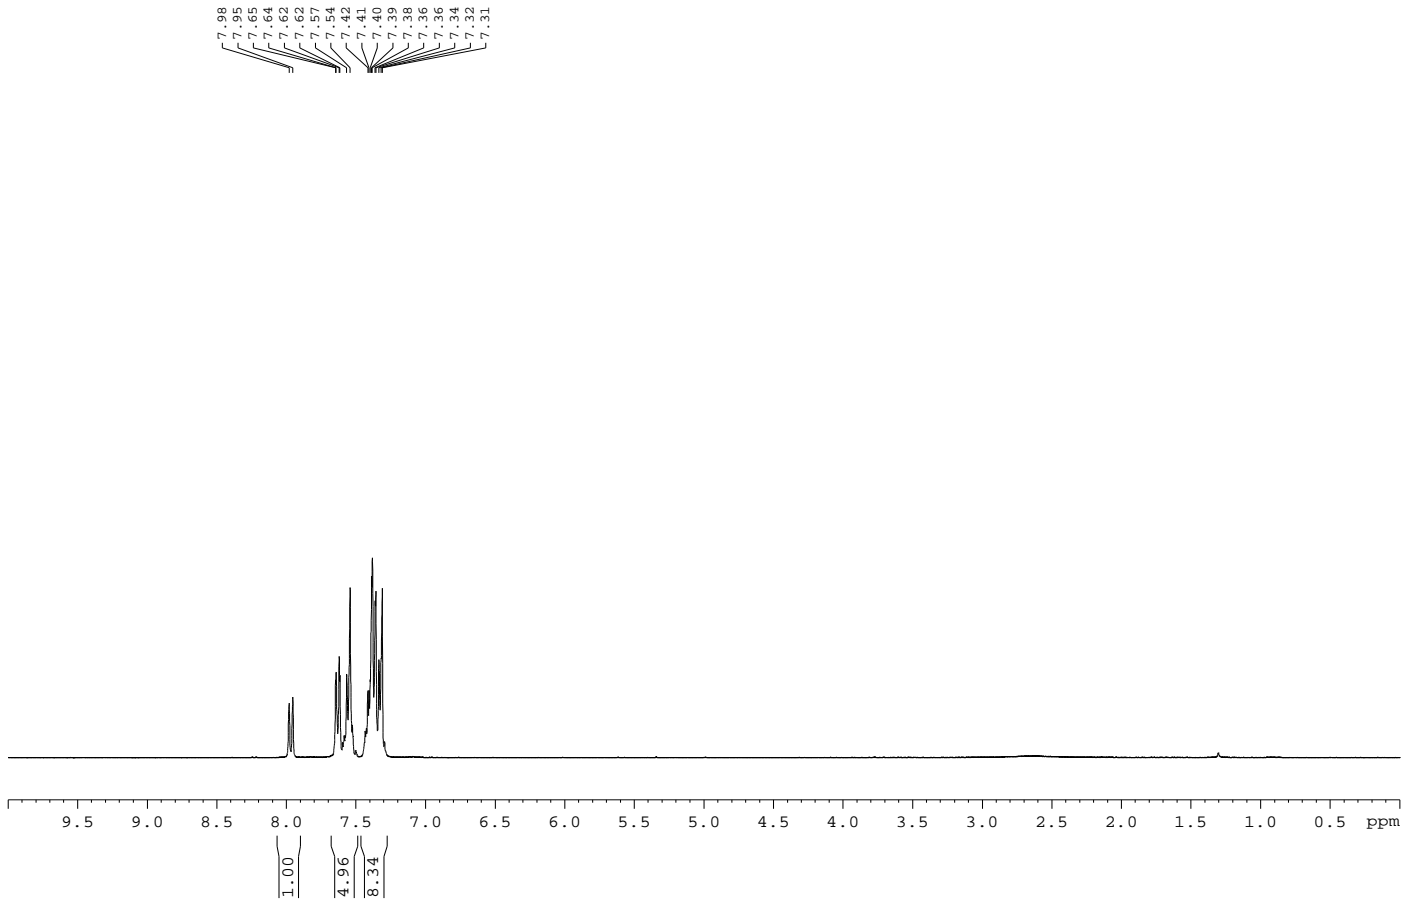

Proton-decoupled carbon NMR spectrum

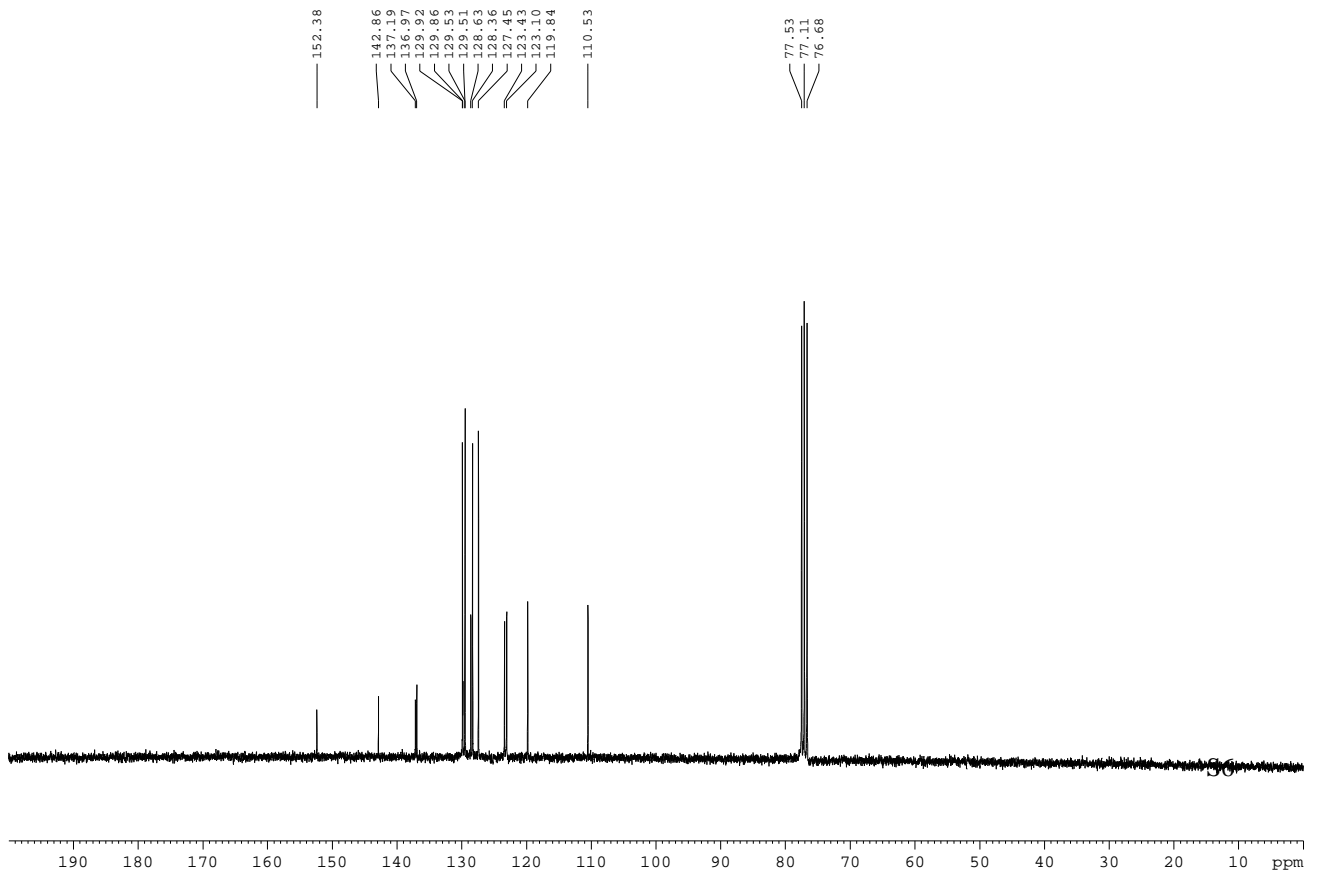

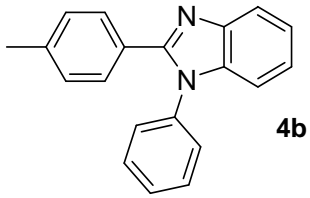

1D proton NMR spectrum

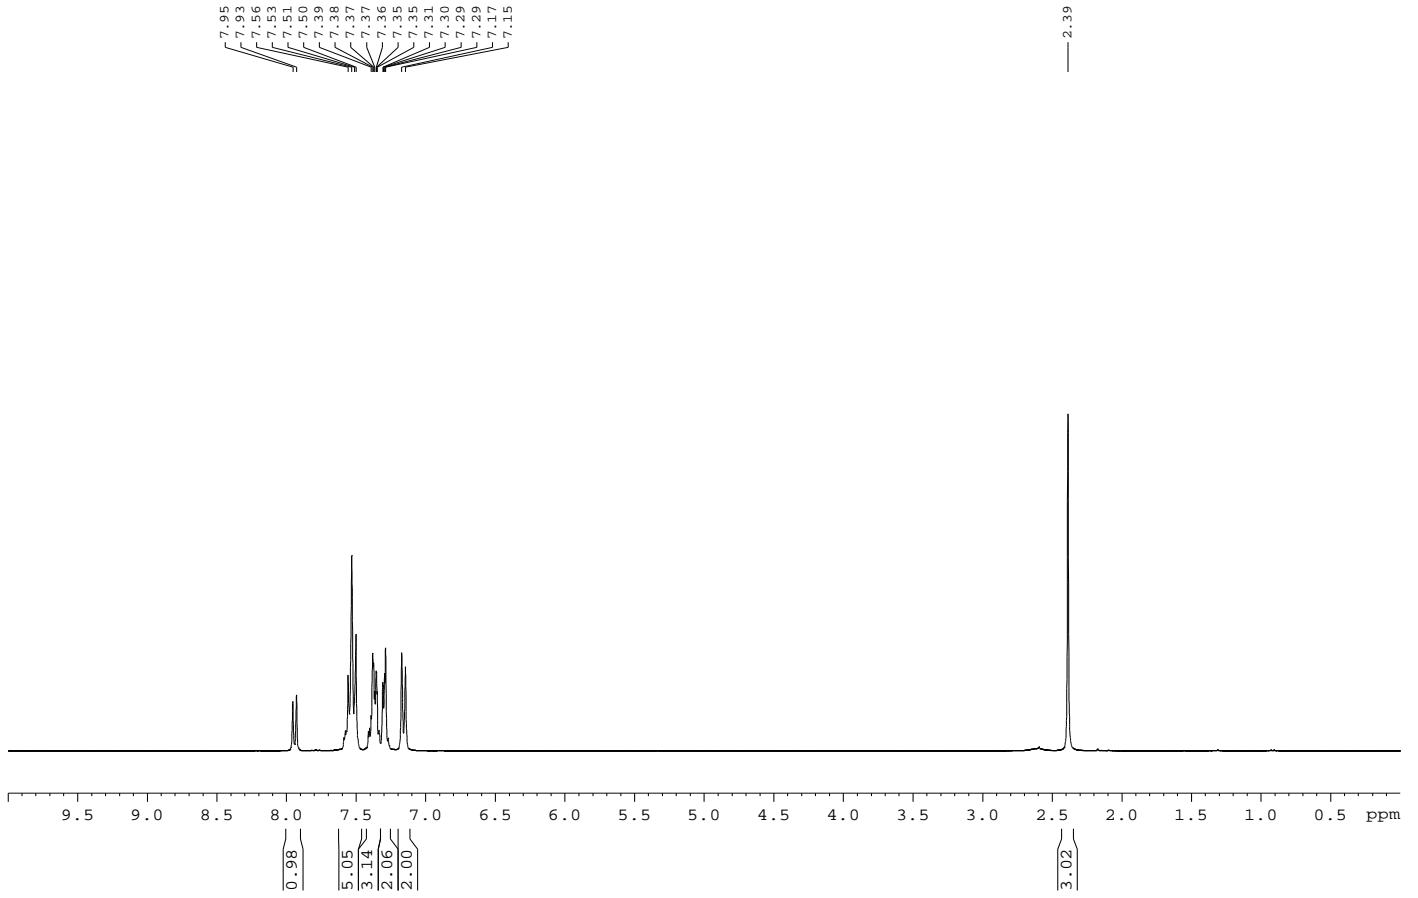

Proton-decoupled carbon NMR spectrum

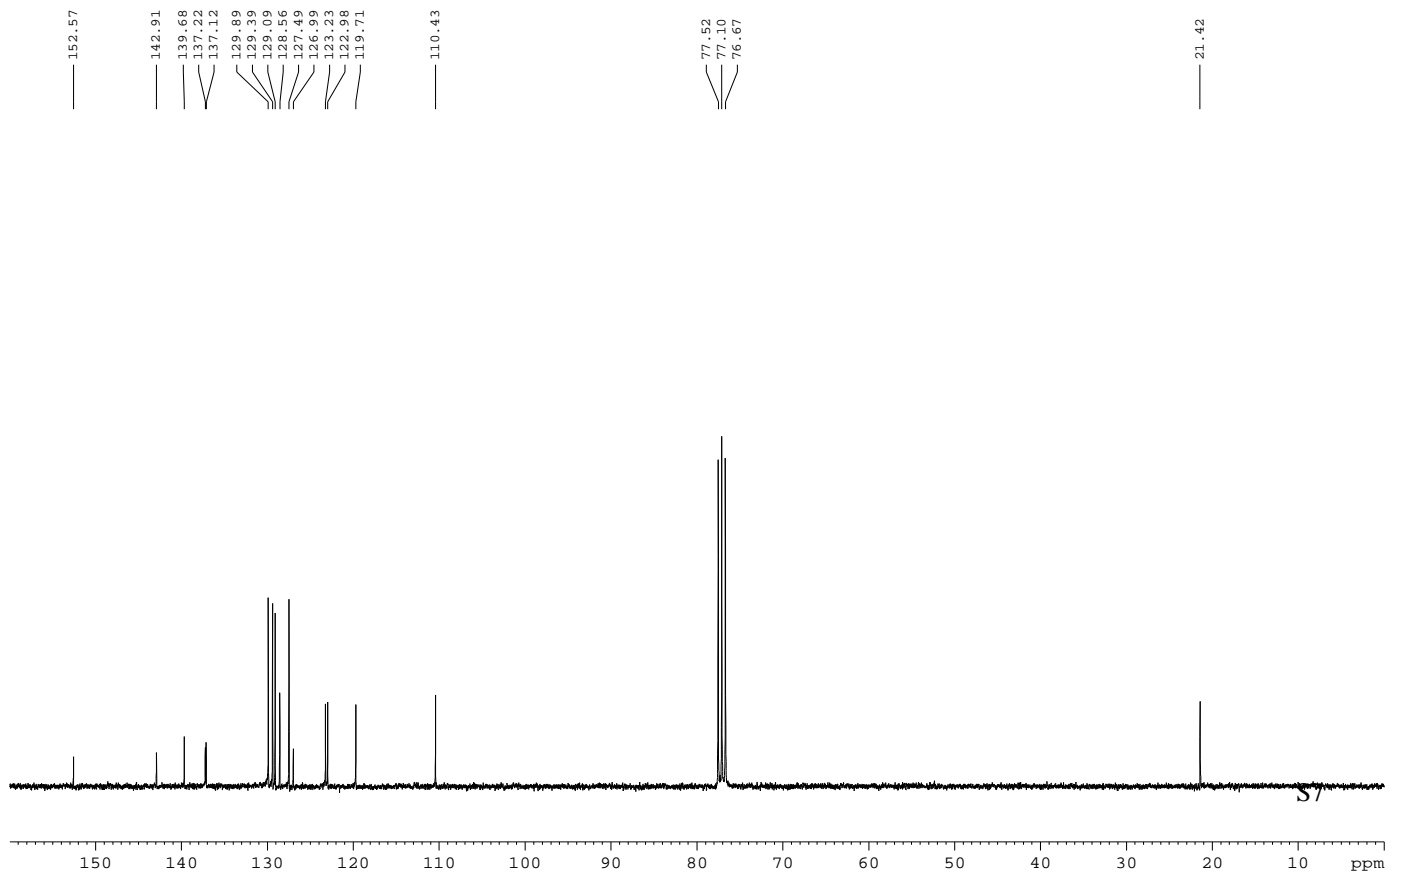



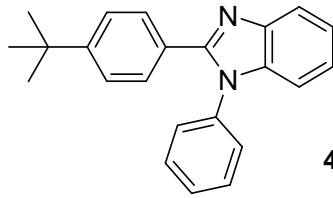

1D proton NMR spectrum

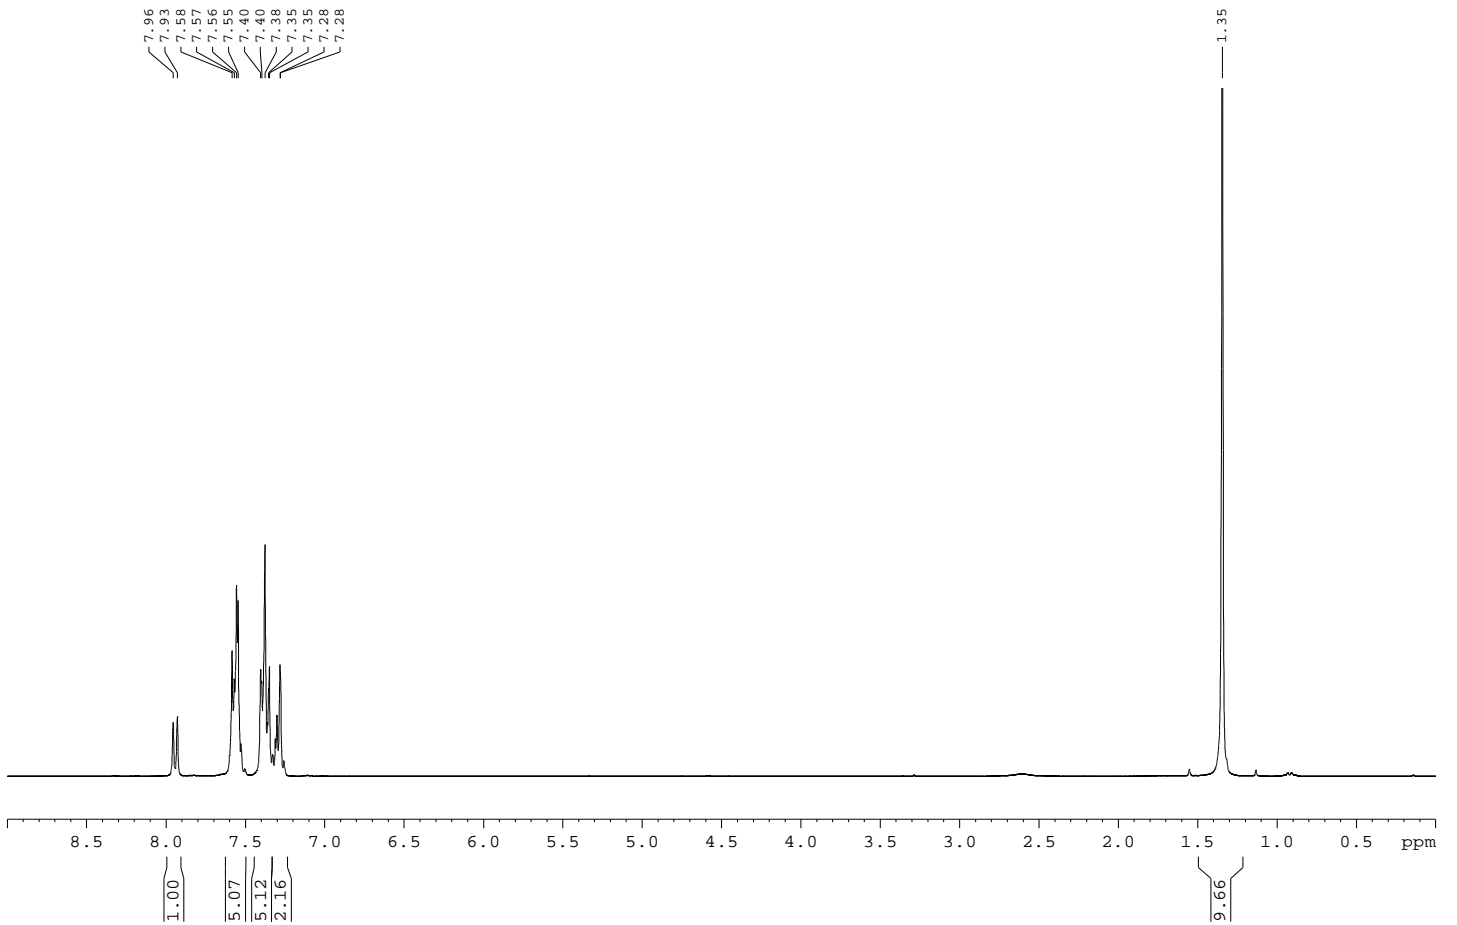

Proton-decoupled carbon NMR spectrum

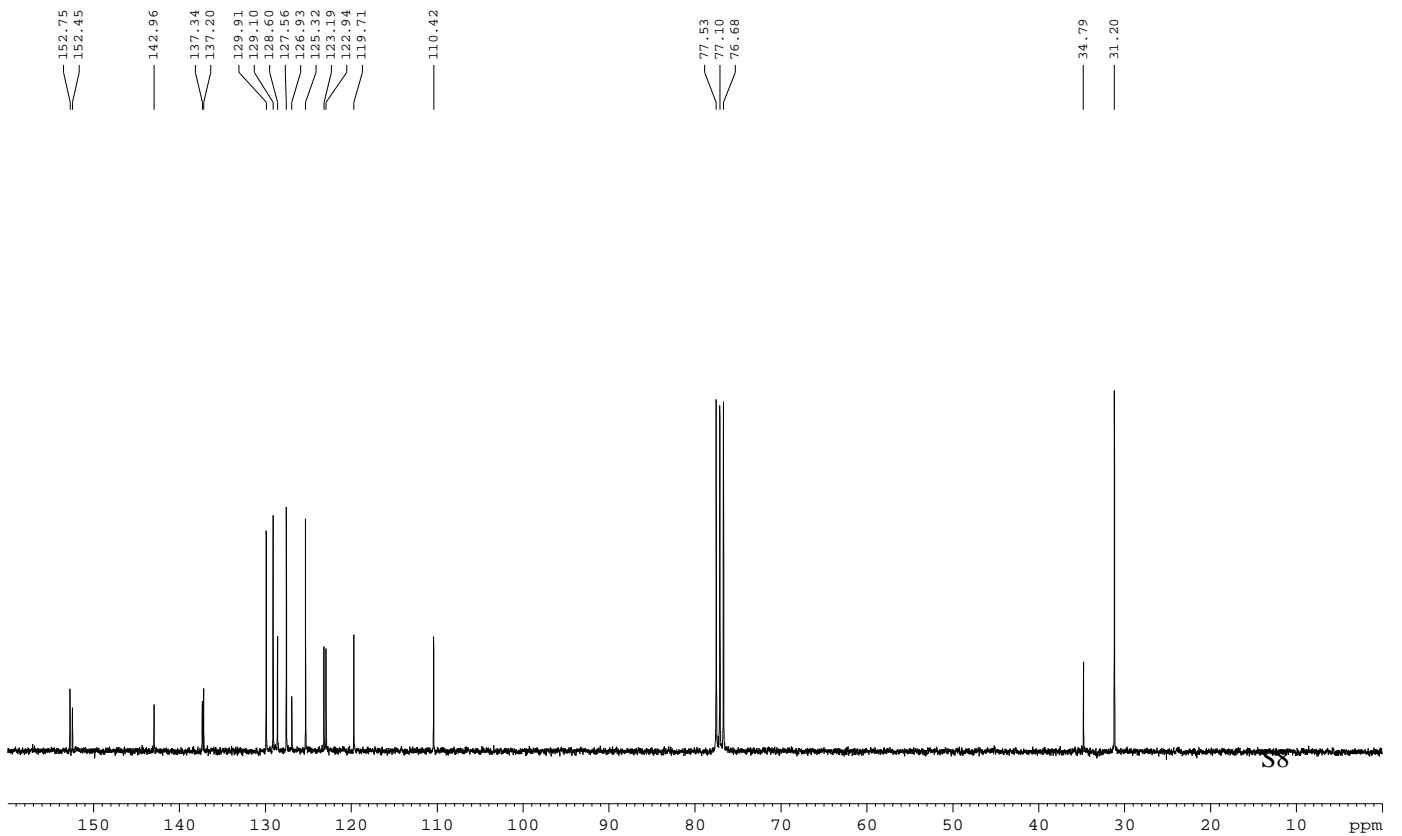

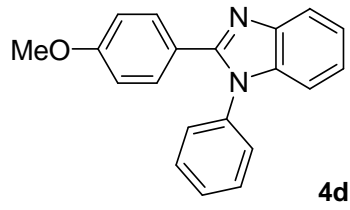

1D proton NMR spectrum

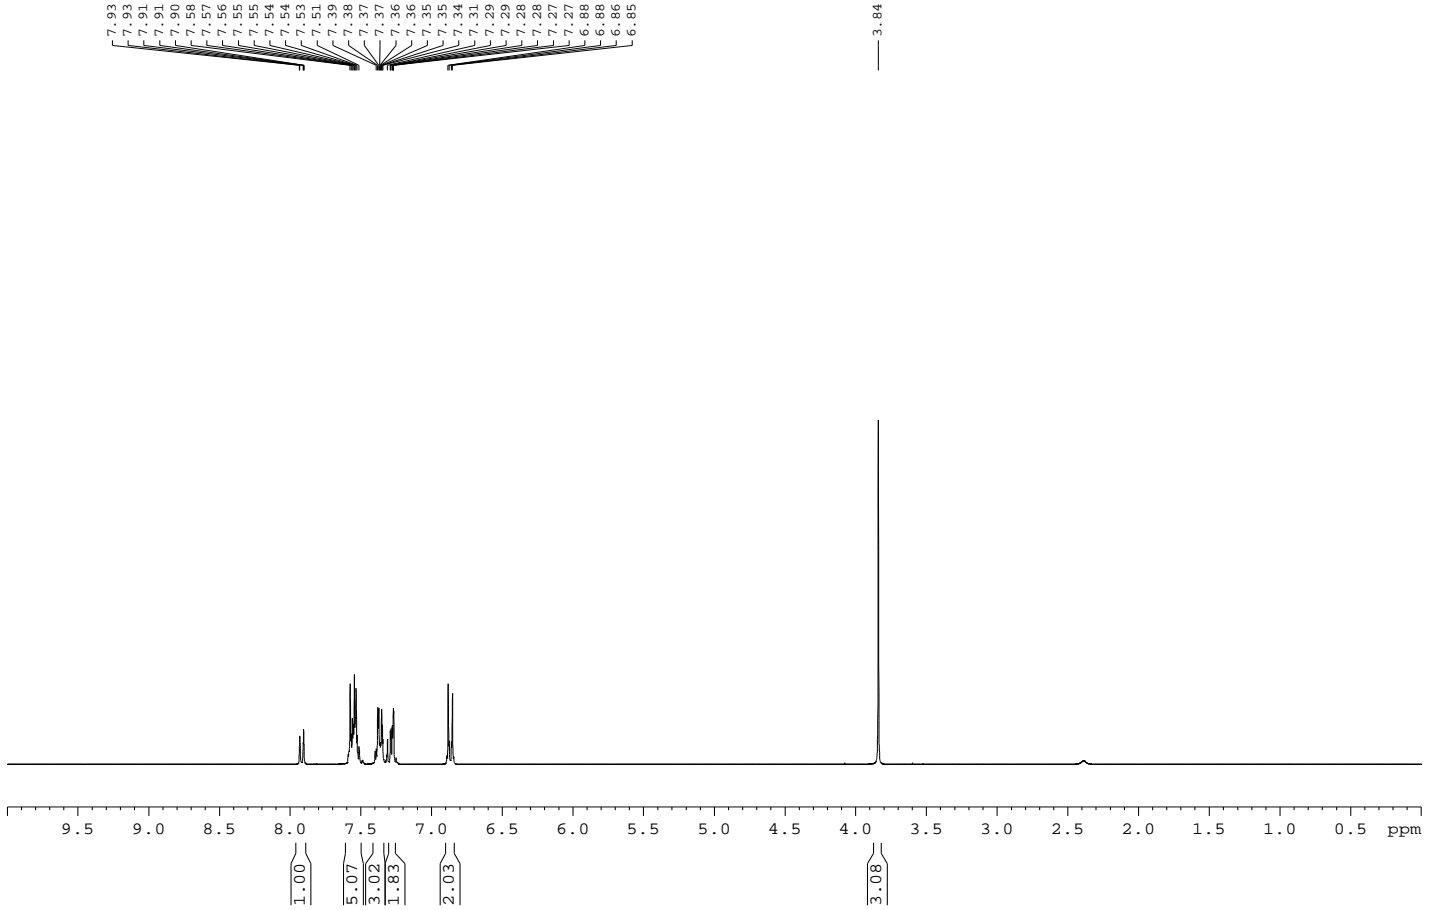

Proton-decoupled carbon NMR spectrum

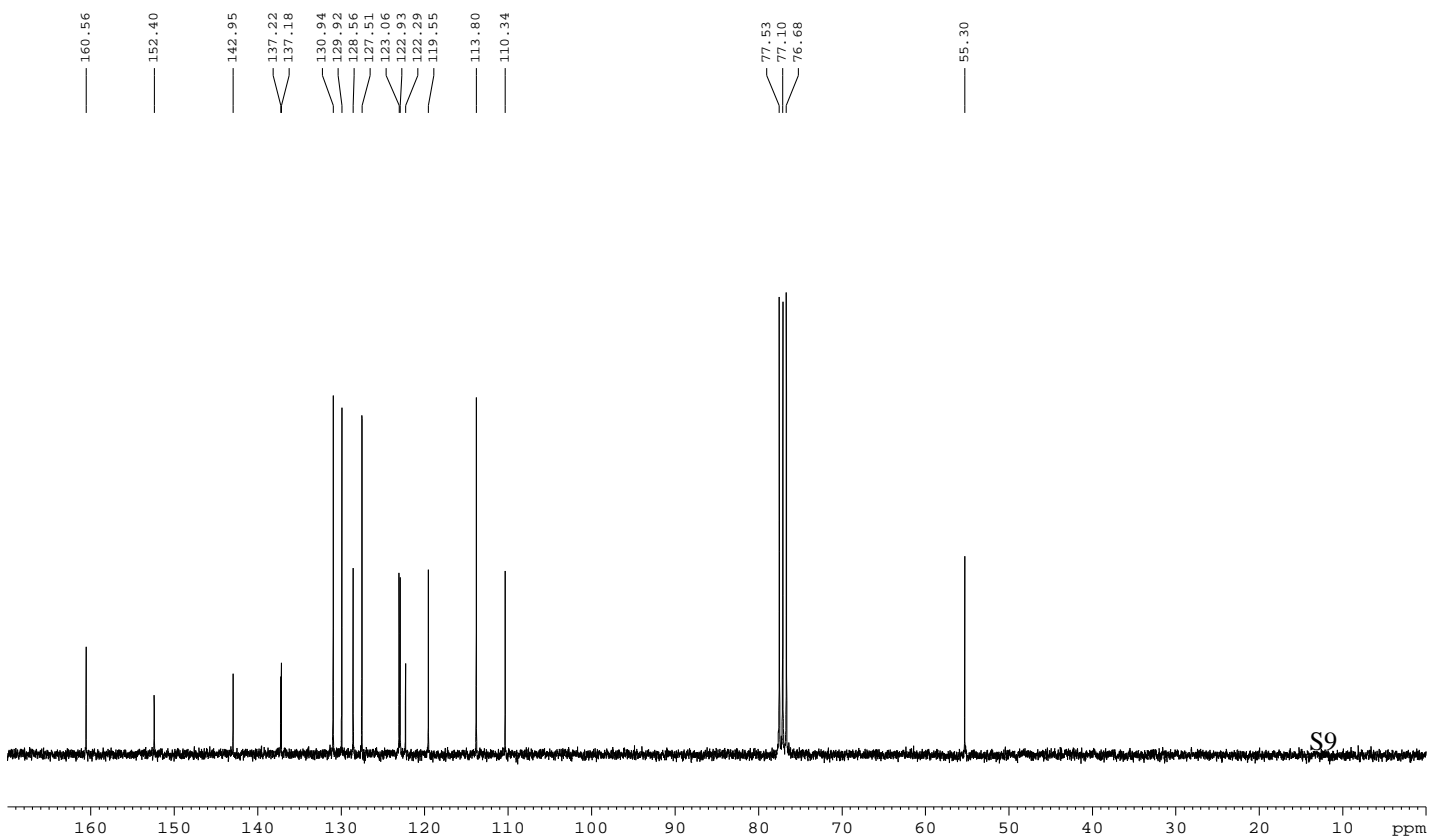

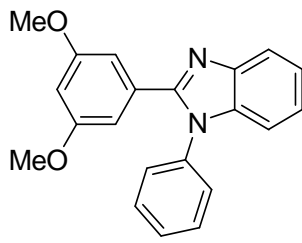

**4e**

1D proton NMR spectrum

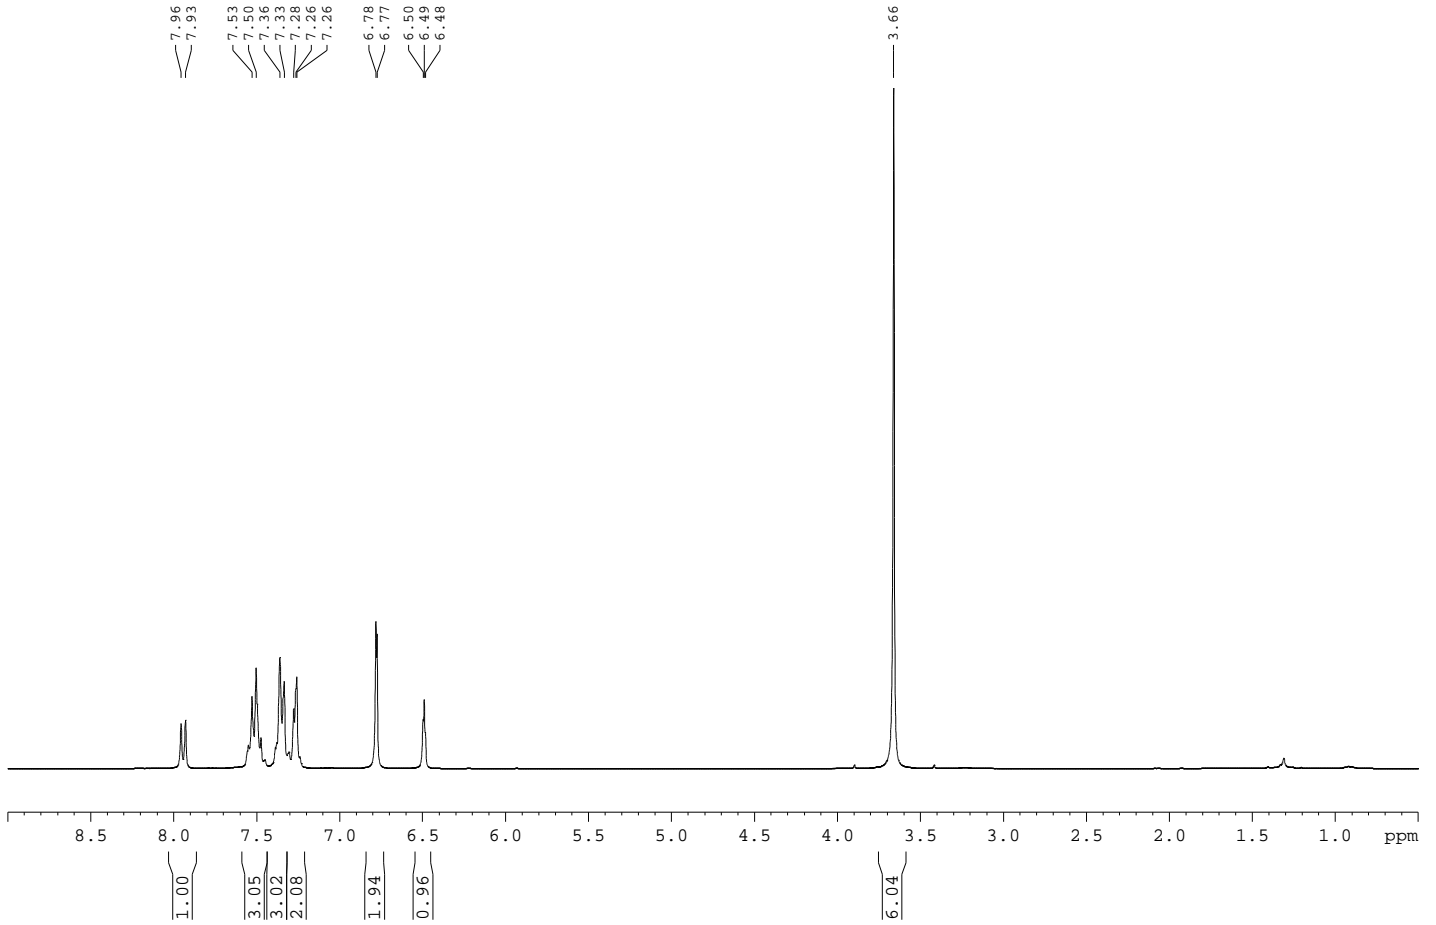

Proton-decoupled carbon NMR spectrum

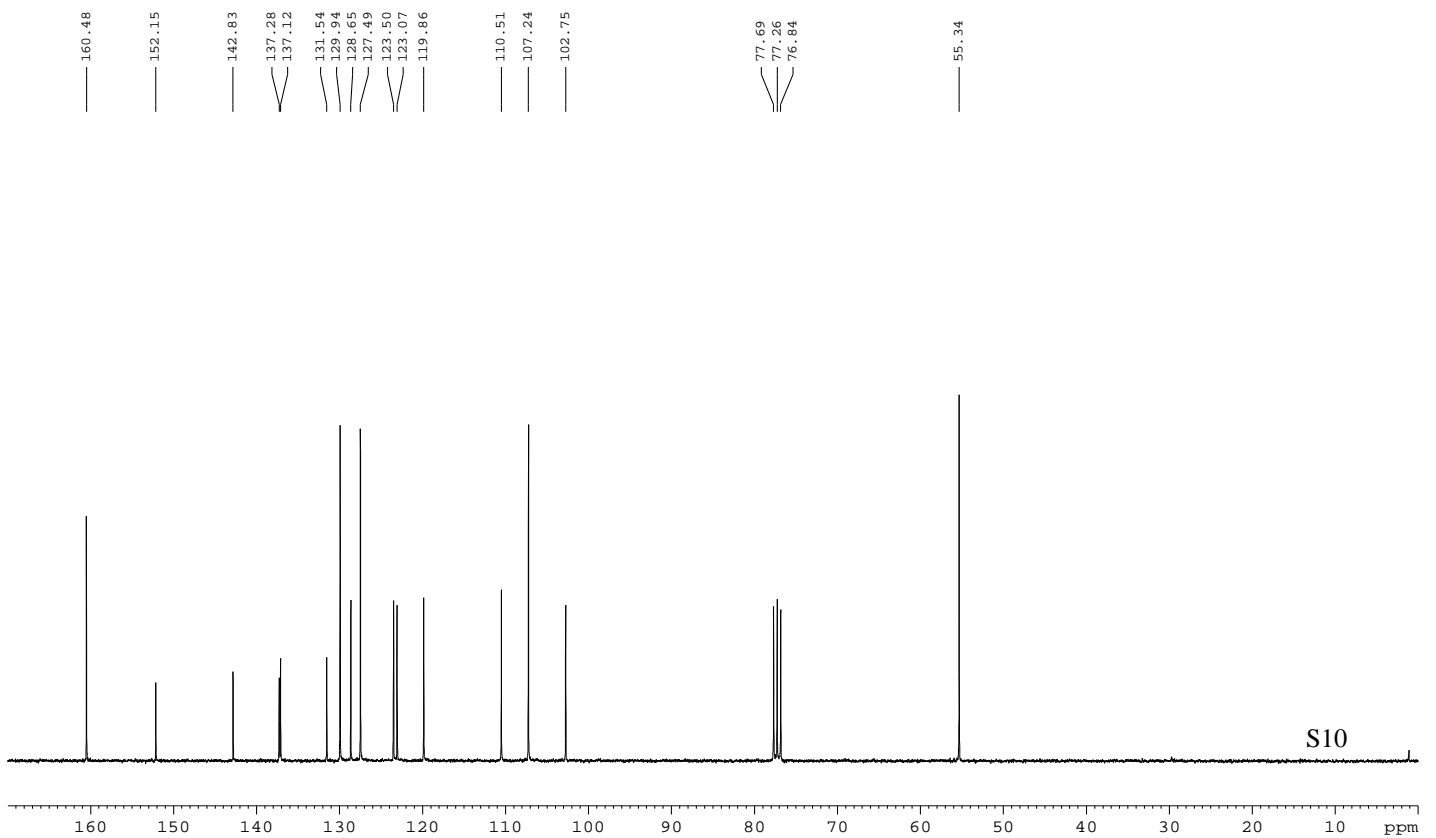

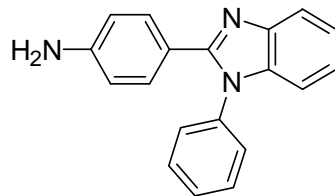

1D proton NMR spectrum

4f

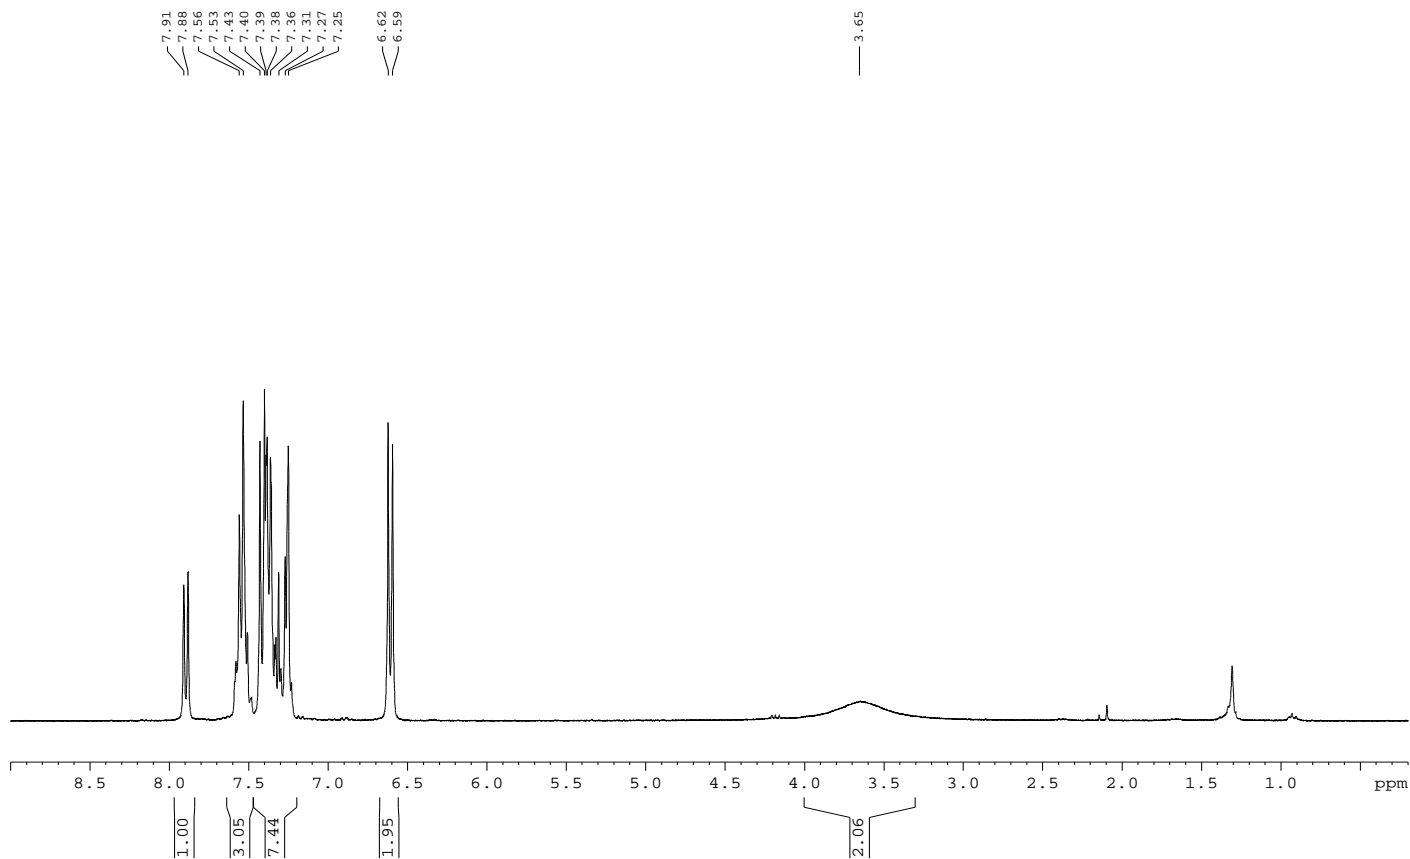

Proton-decoupled carbon NMR spectrum

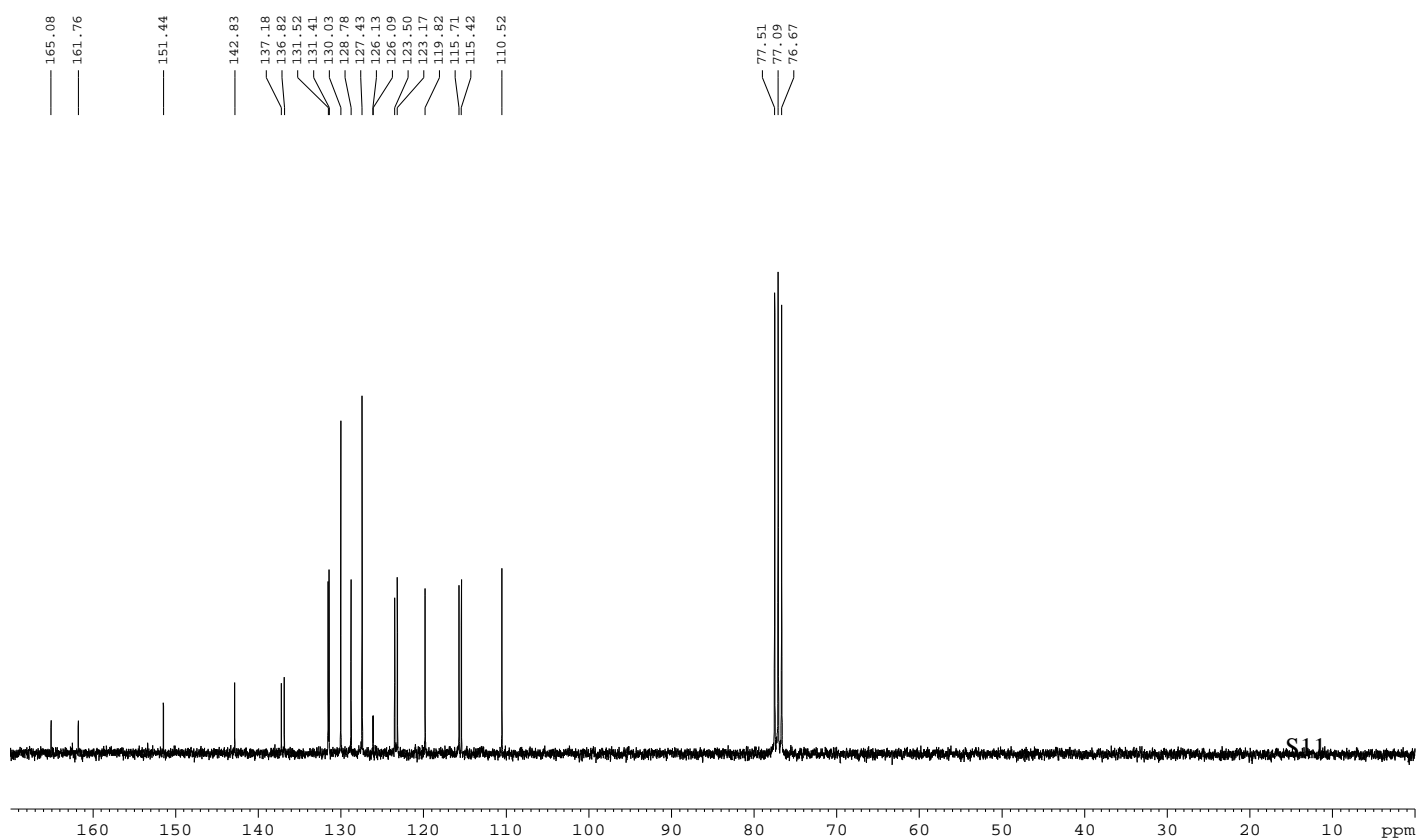

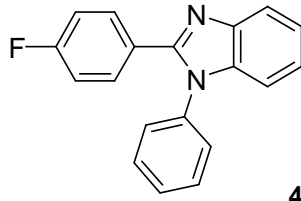

4g

1D proton NMR spectrum

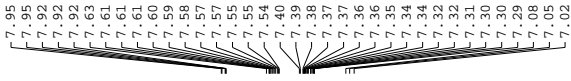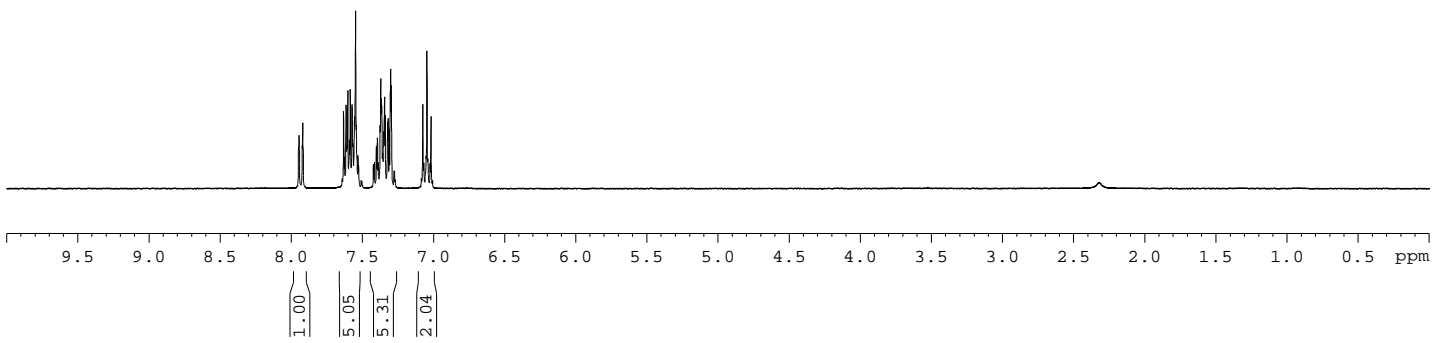

Proton-decoupled carbon NMR spectrum

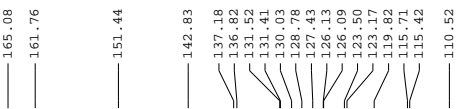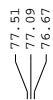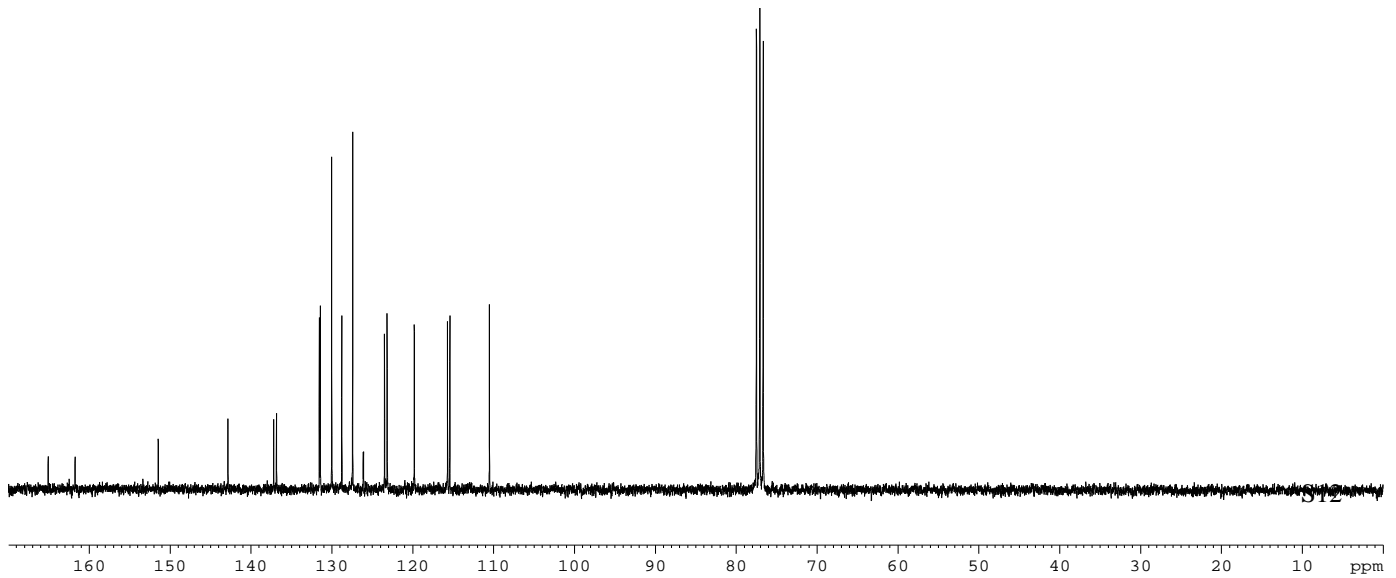

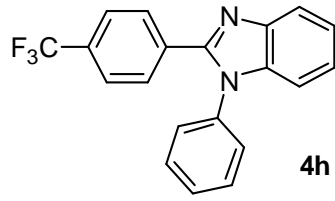

1D proton NMR spectrum

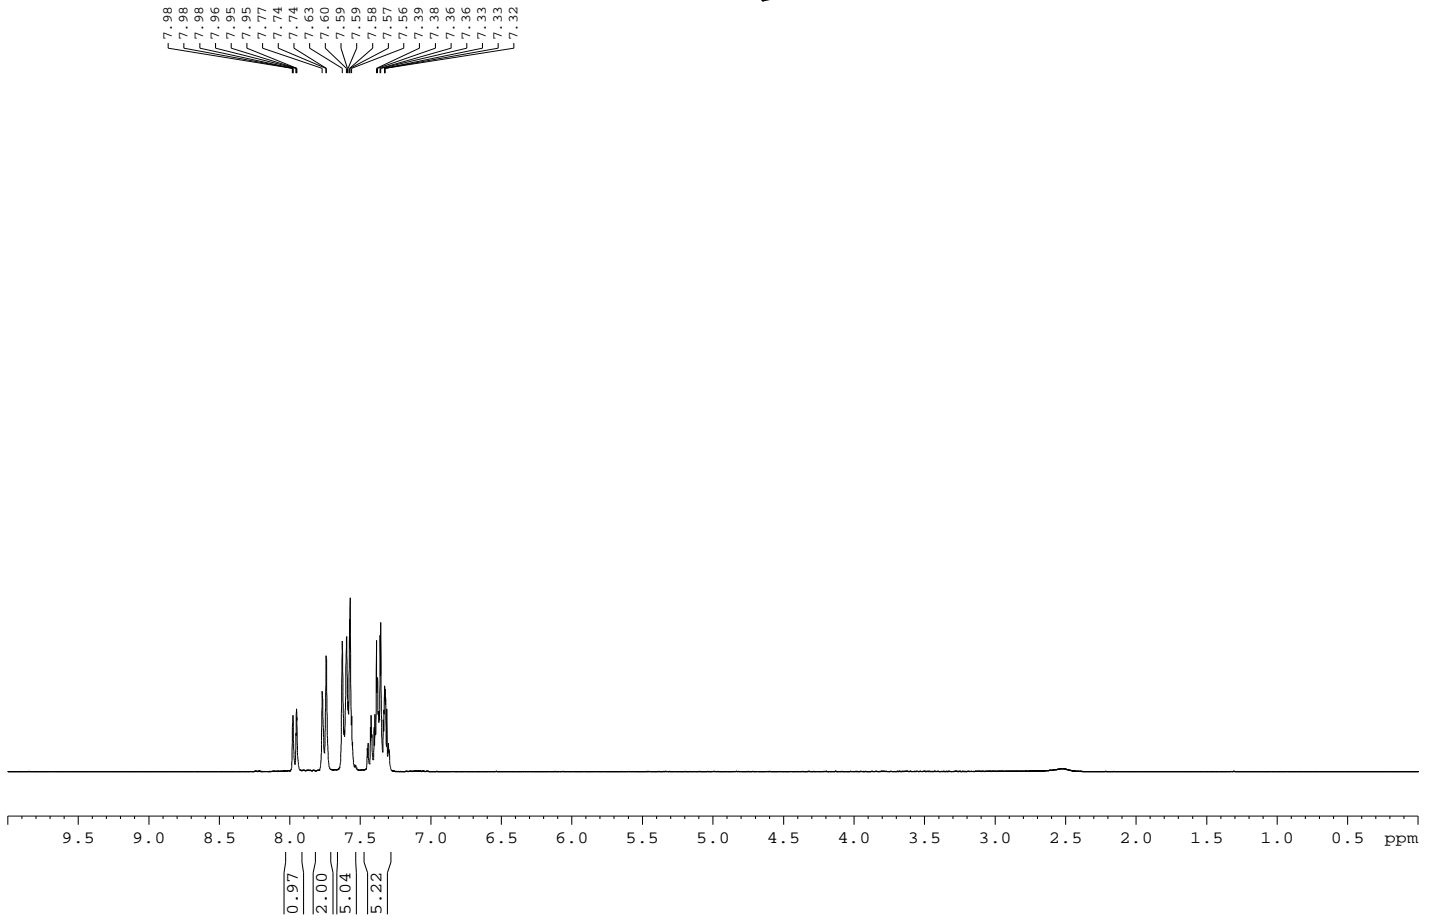

Proton-decoupled carbon NMR spectrum

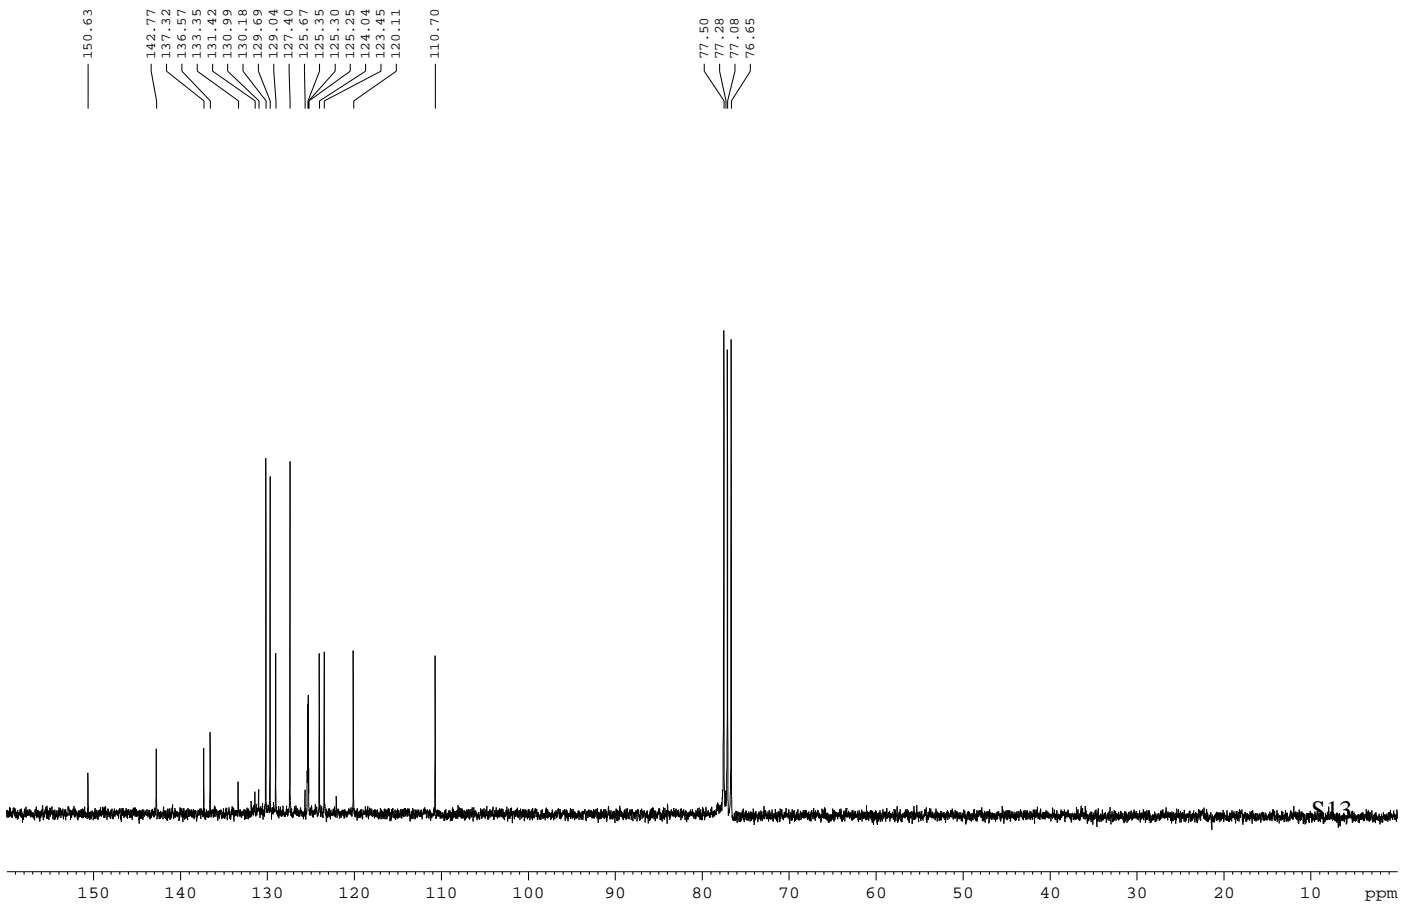

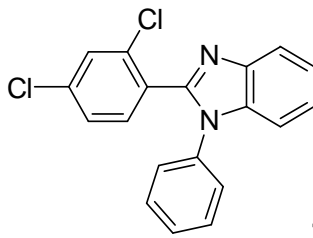

**4i**

1D proton NMR spectrum

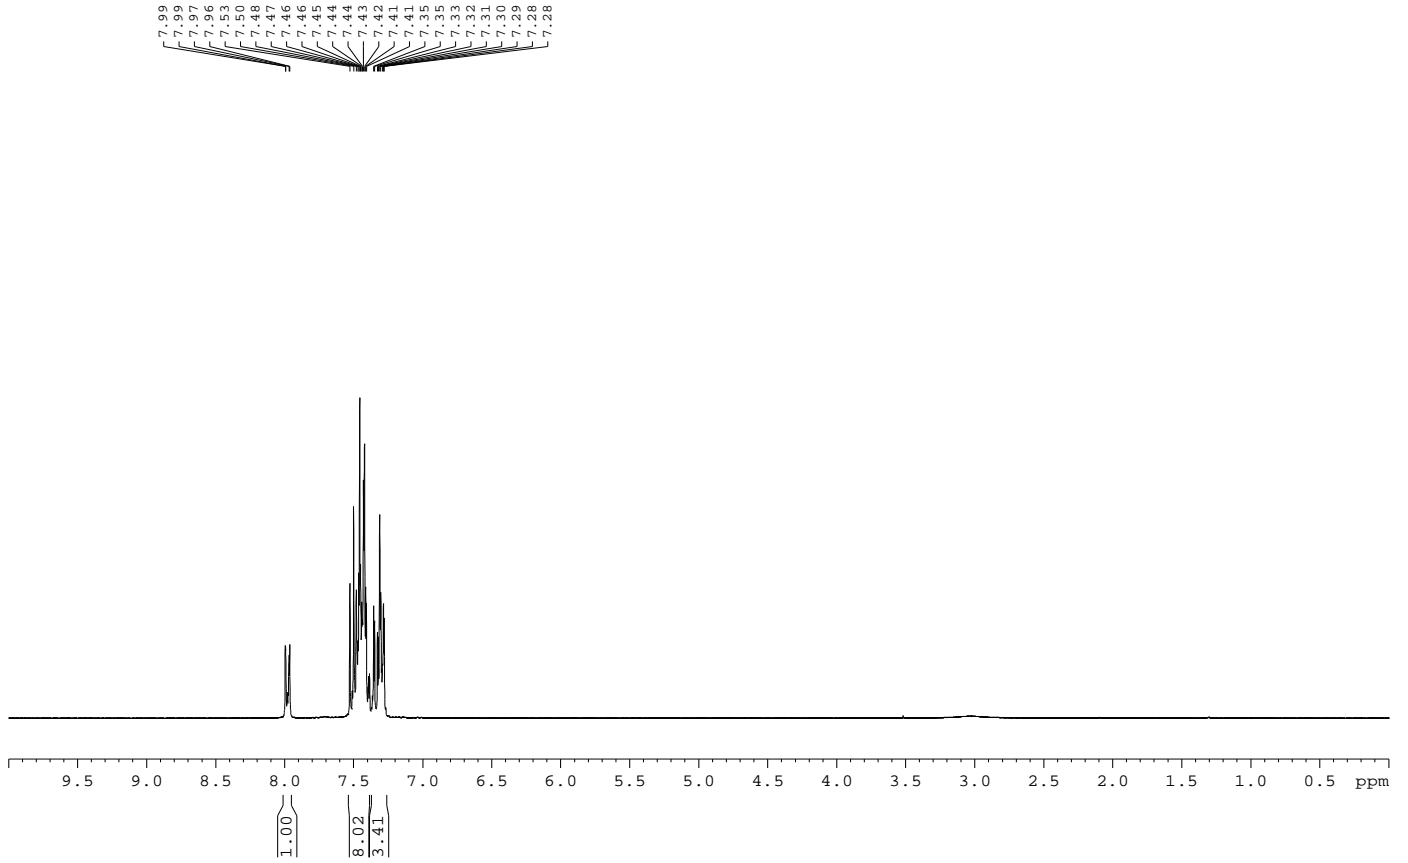

Proton-decoupled carbon NMR spectrum

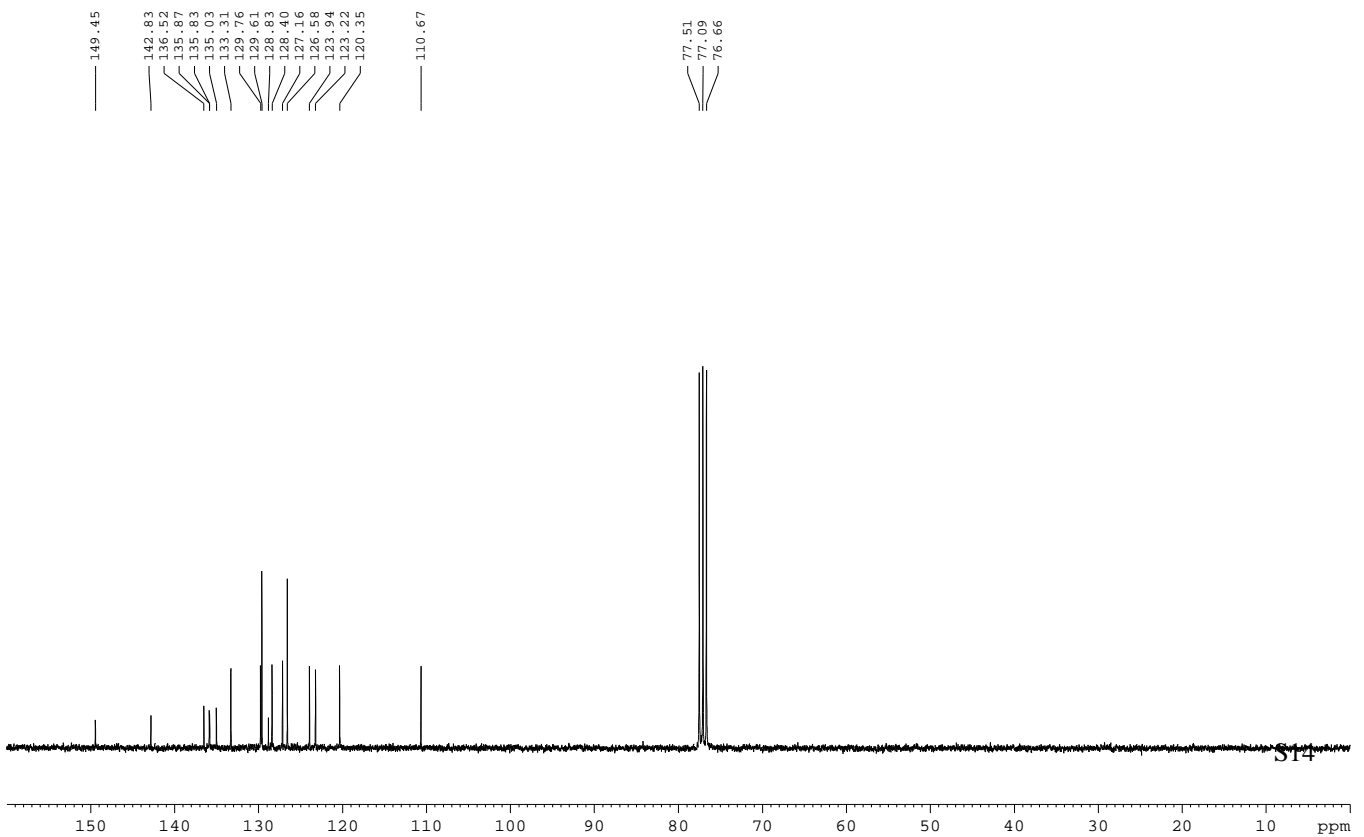

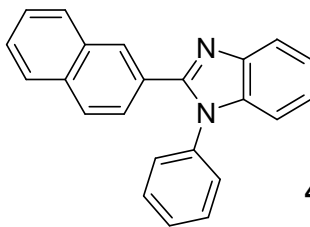

4j

1D proton NMR spectrum

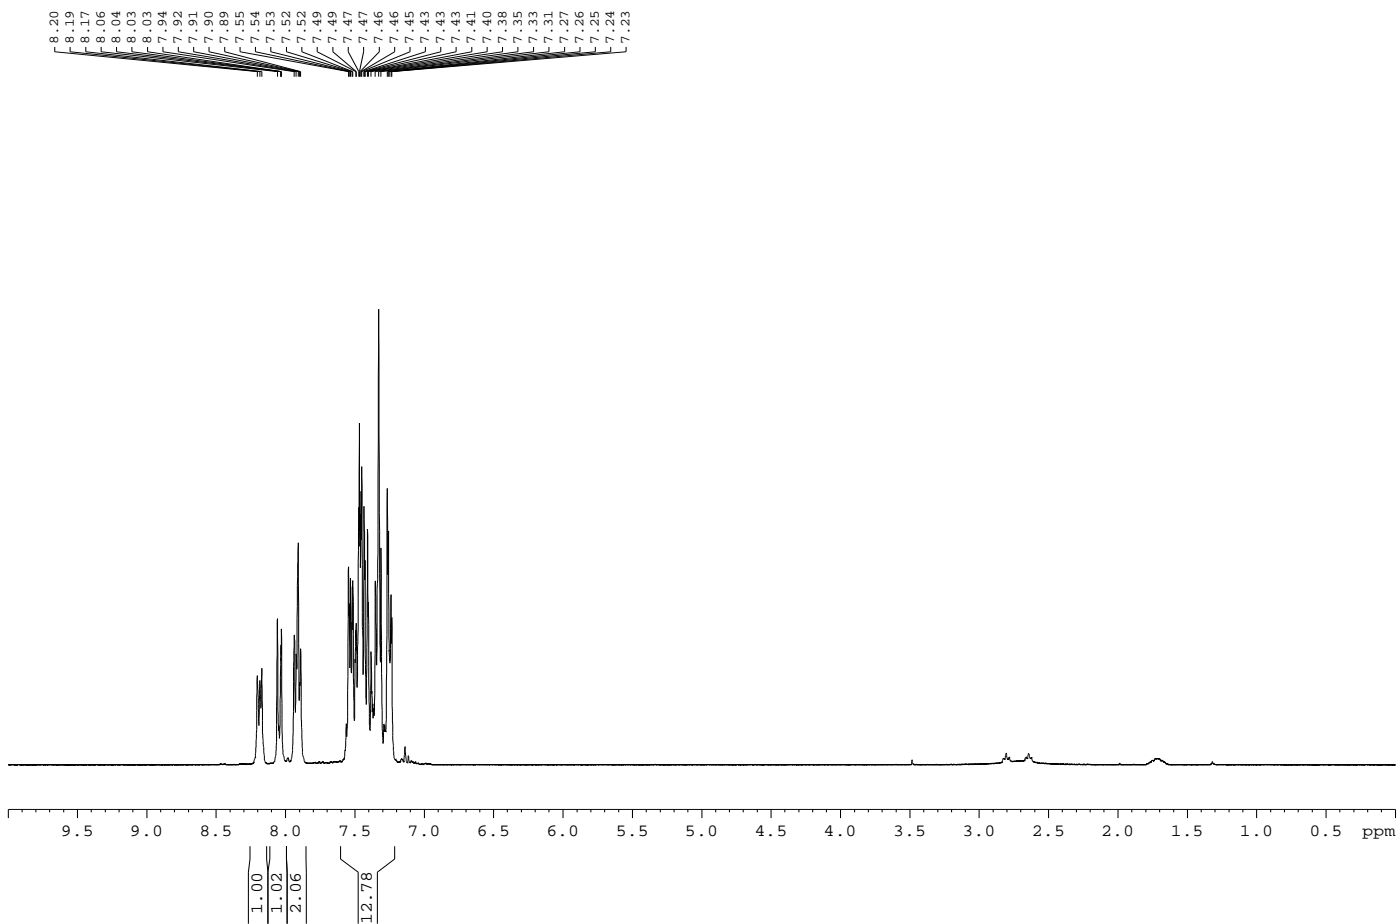

Proton-decoupled carbon NMR spectrum

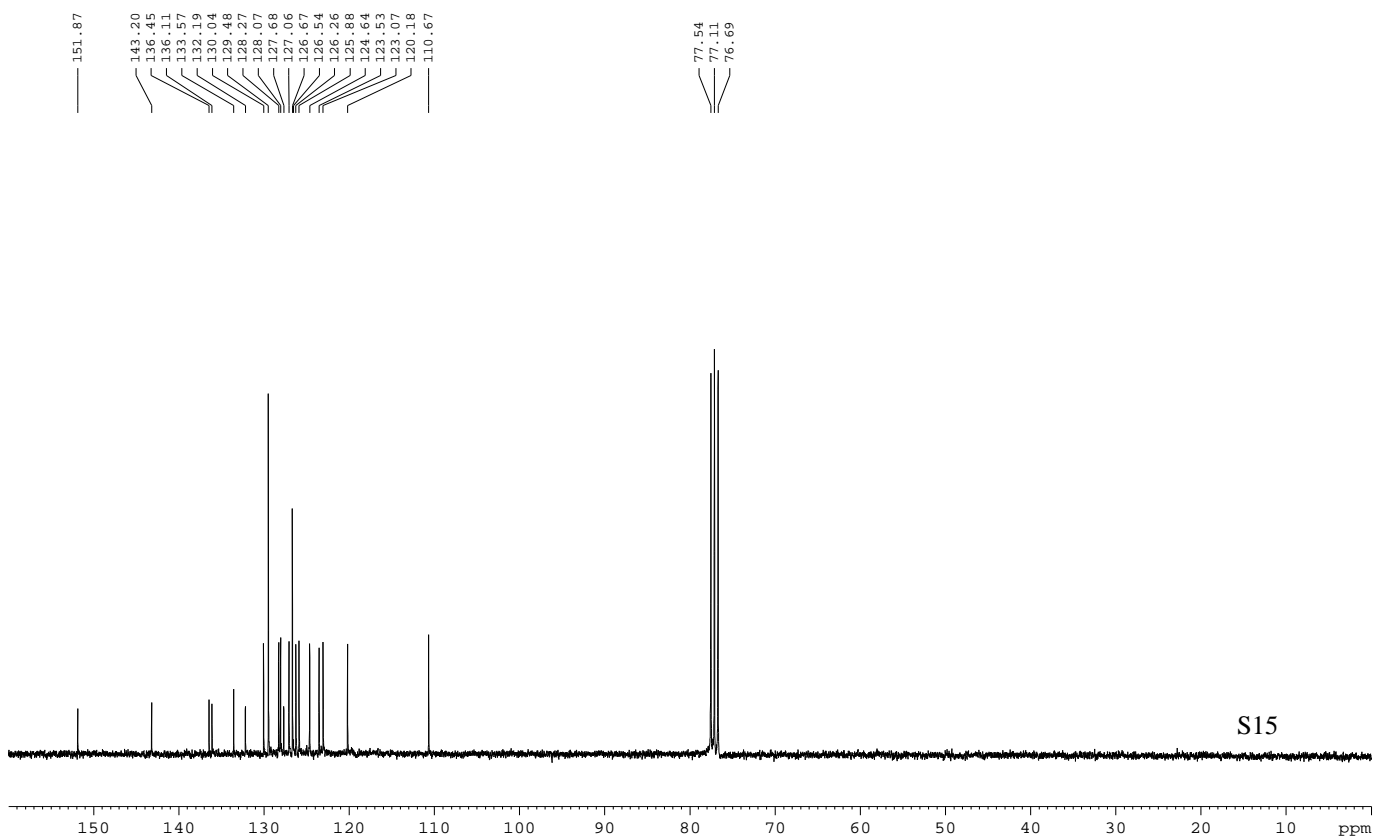



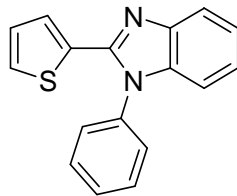

4k

1D proton NMR spectrum

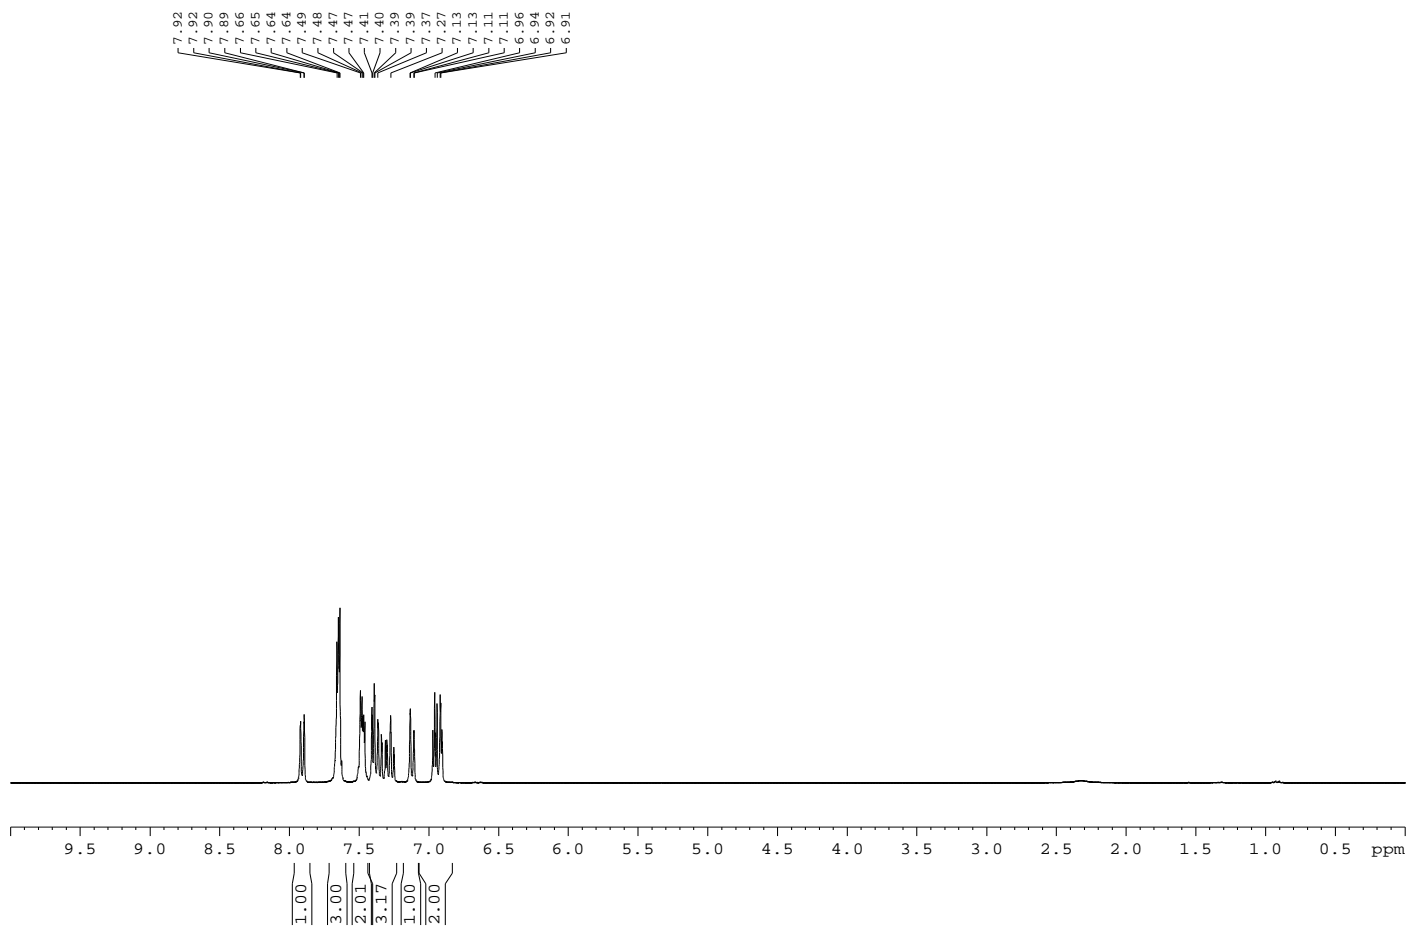

Proton-decoupled carbon NMR spectrum

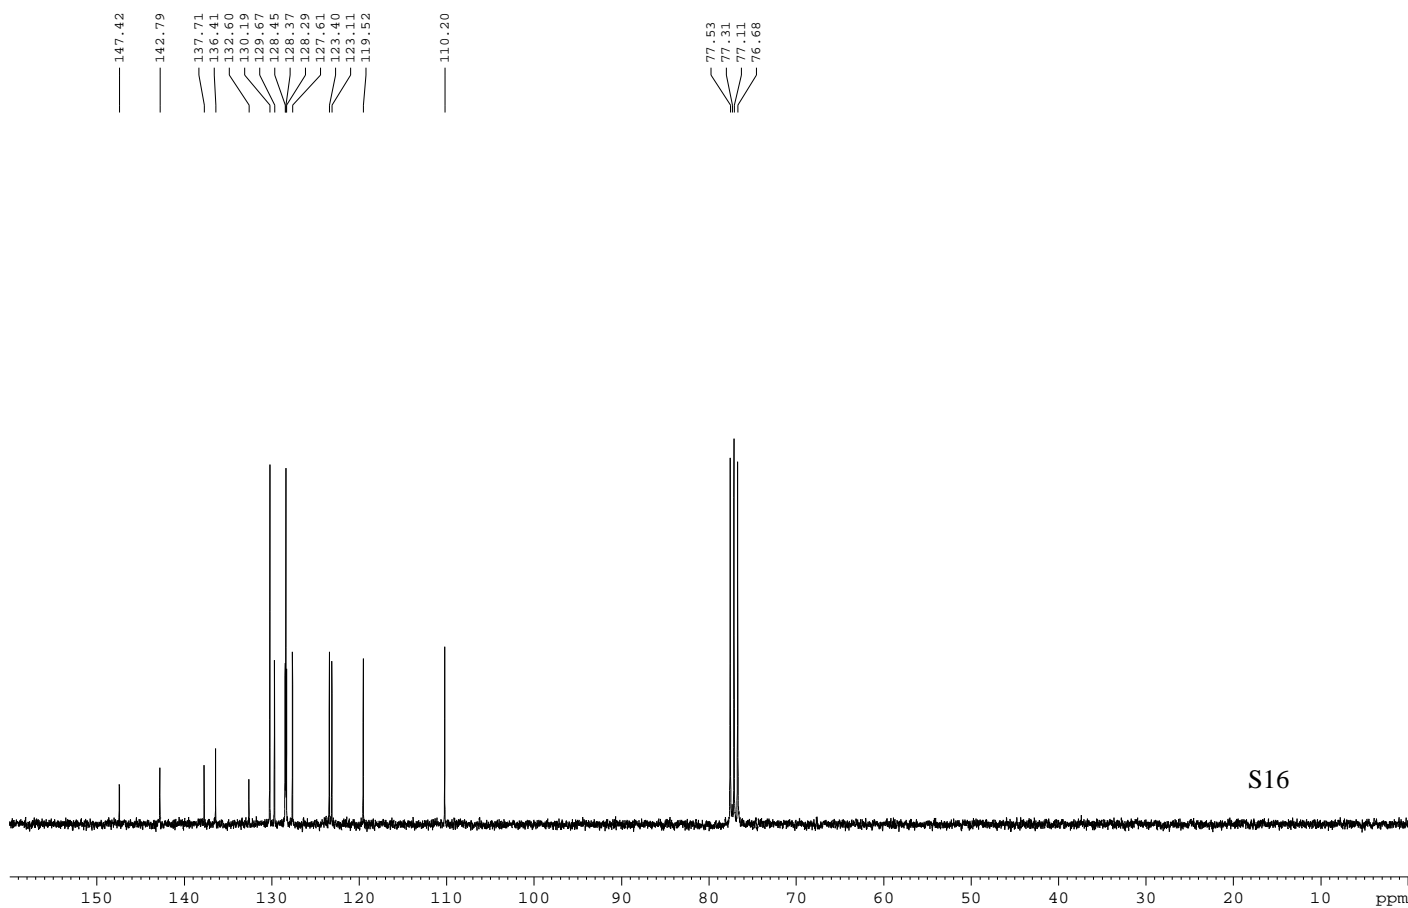

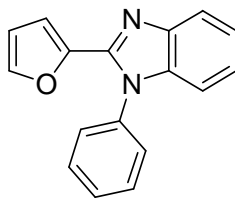

4I

1D proton NMR spectrum

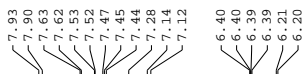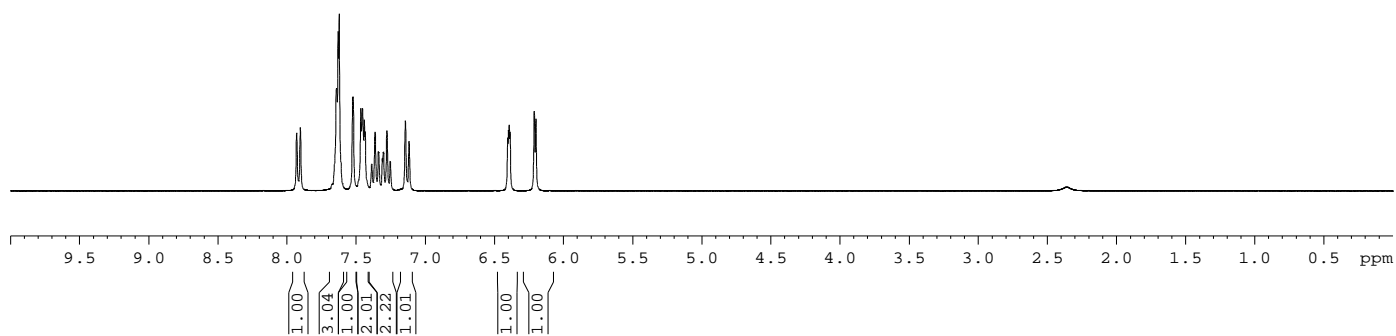

Proton-decoupled carbon NMR spectrum

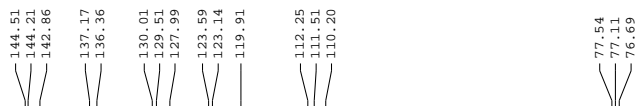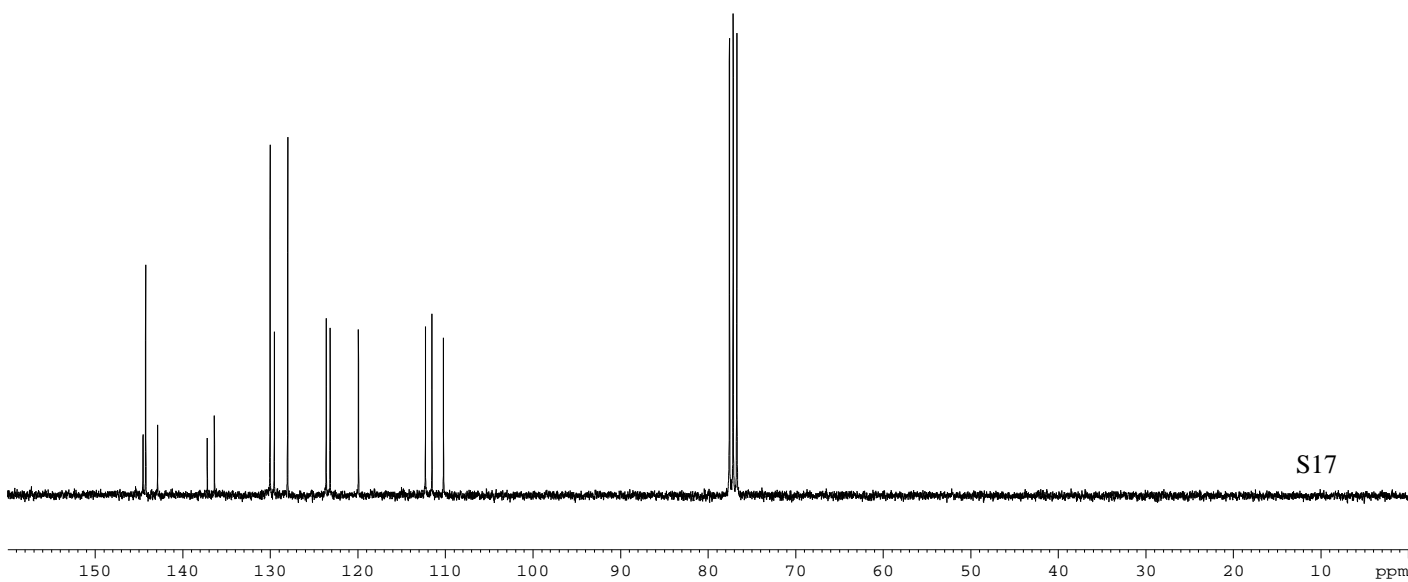

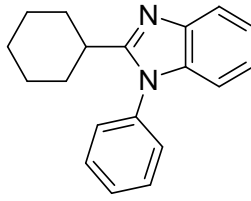

1D proton NMR spectrum

4m

7.87  
7.85  
7.64  
7.62  
7.61  
7.42  
7.36  
7.39  
7.31  
7.23  
7.12  
7.09

2.78  
2.76  
2.75  
2.74  
2.73  
1.97  
1.94  
1.93  
1.91  
1.90  
1.86  
1.84  
1.83  
1.82  
1.74  
1.70  
1.39  
1.36  
1.35  
1.31  
1.27  
1.26  
1.25  
1.22

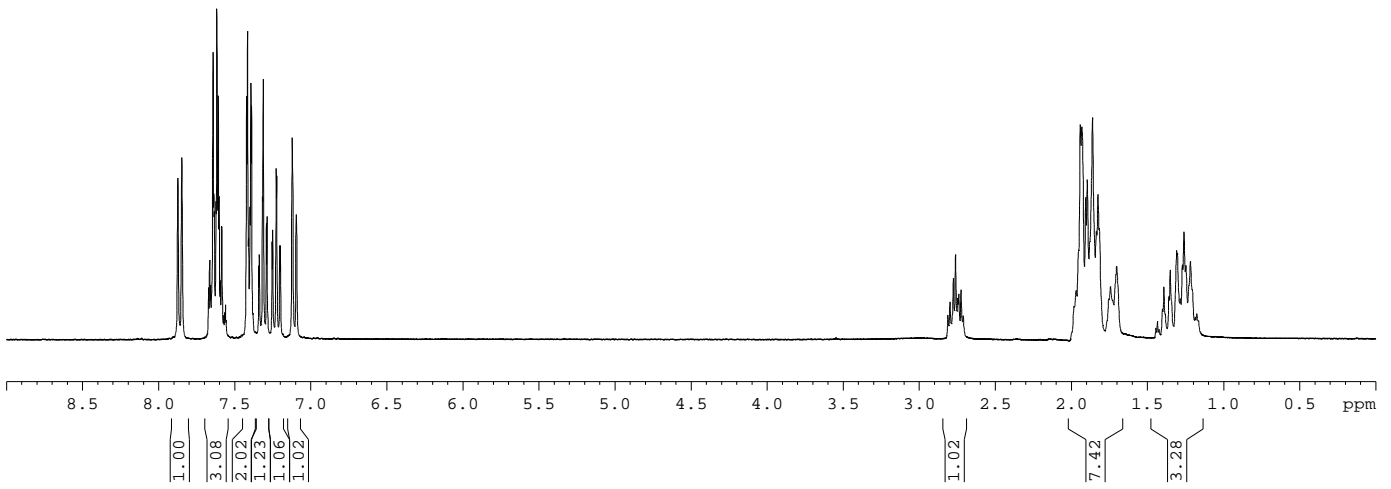

Proton-decoupled carbon NMR spectrum

159.28  
142.34  
136.39  
136.01  
129.96  
128.99  
127.60  
122.53  
122.36  
119.15  
110.07  
77.51  
77.09  
76.66  
36.21  
32.02  
26.16  
25.70

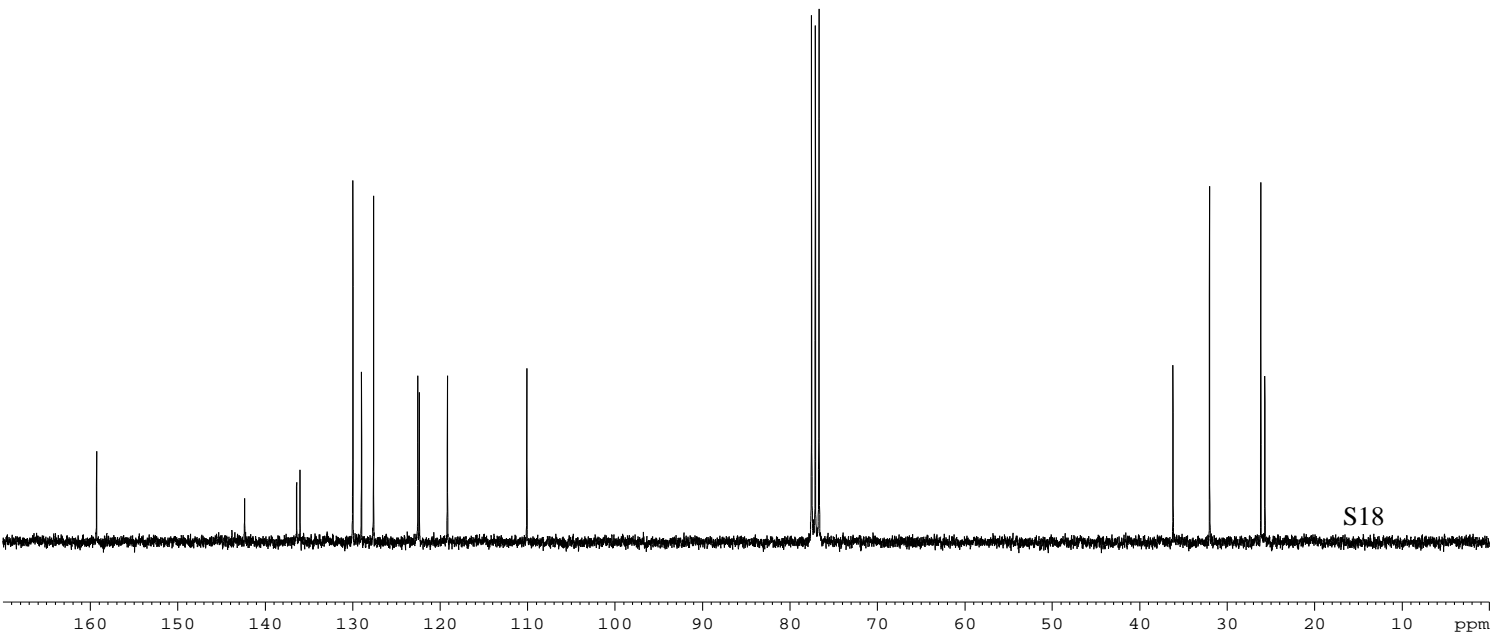

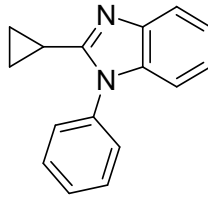

**4n**

1D proton NMR spectrum

7.78  
7.76  
7.62  
7.61  
7.54  
7.52  
7.50  
7.29  
7.28  
7.26  
7.25  
7.20  
7.18  
7.18

1.90  
1.40  
1.39  
1.38  
1.37  
1.10  
1.08  
1.07  
1.06

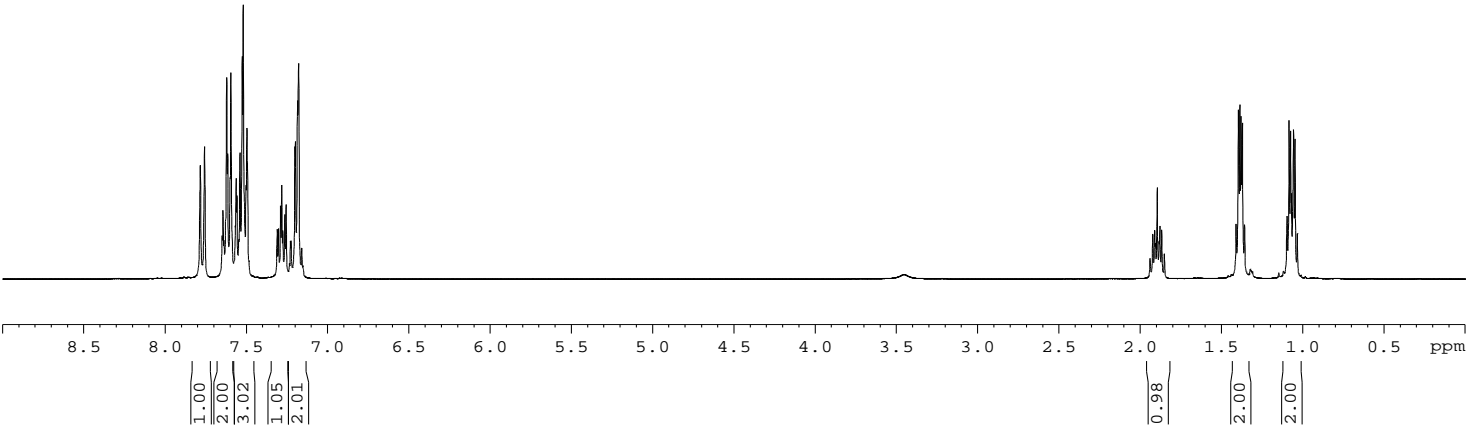

Proton-decoupled carbon NMR spectrum

156.88  
142.45  
136.52  
136.02  
129.86  
128.66  
127.37  
122.43  
122.23  
118.82  
109.68

77.55  
77.12  
76.70

9.61  
8.29

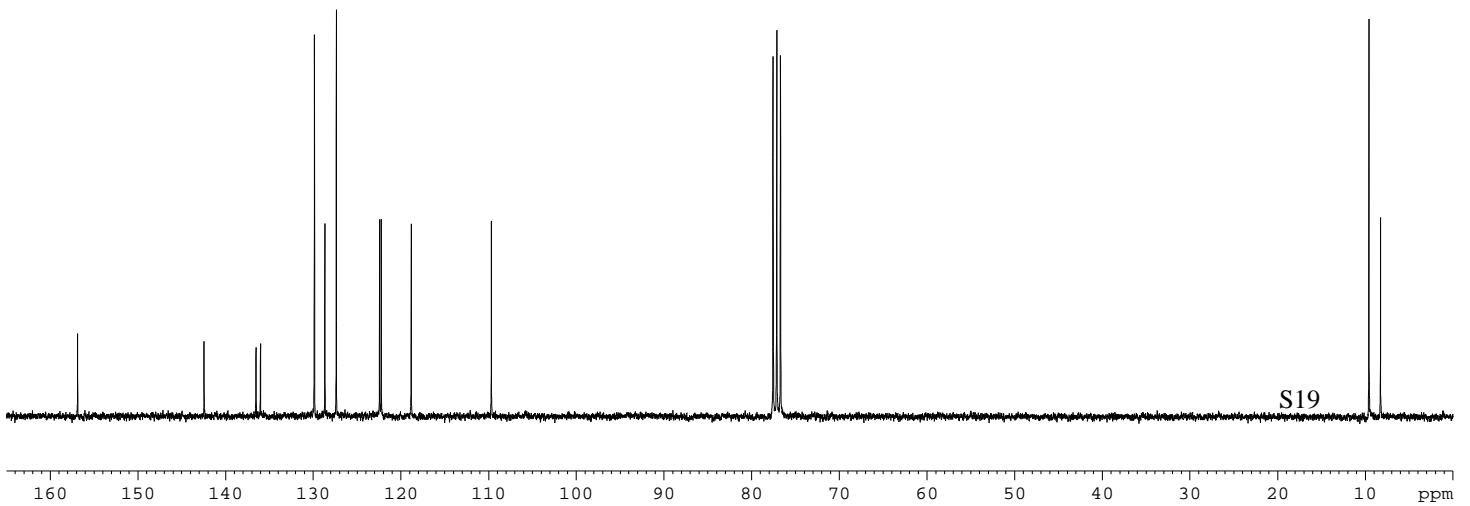

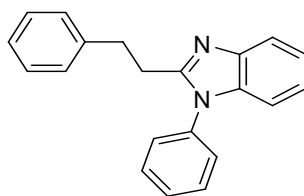

4o

1D proton NMR spectrum

7.90  
7.87  
7.57  
7.36  
7.33  
7.31  
7.25  
7.14  
7.13

3.20  
3.16  
3.13

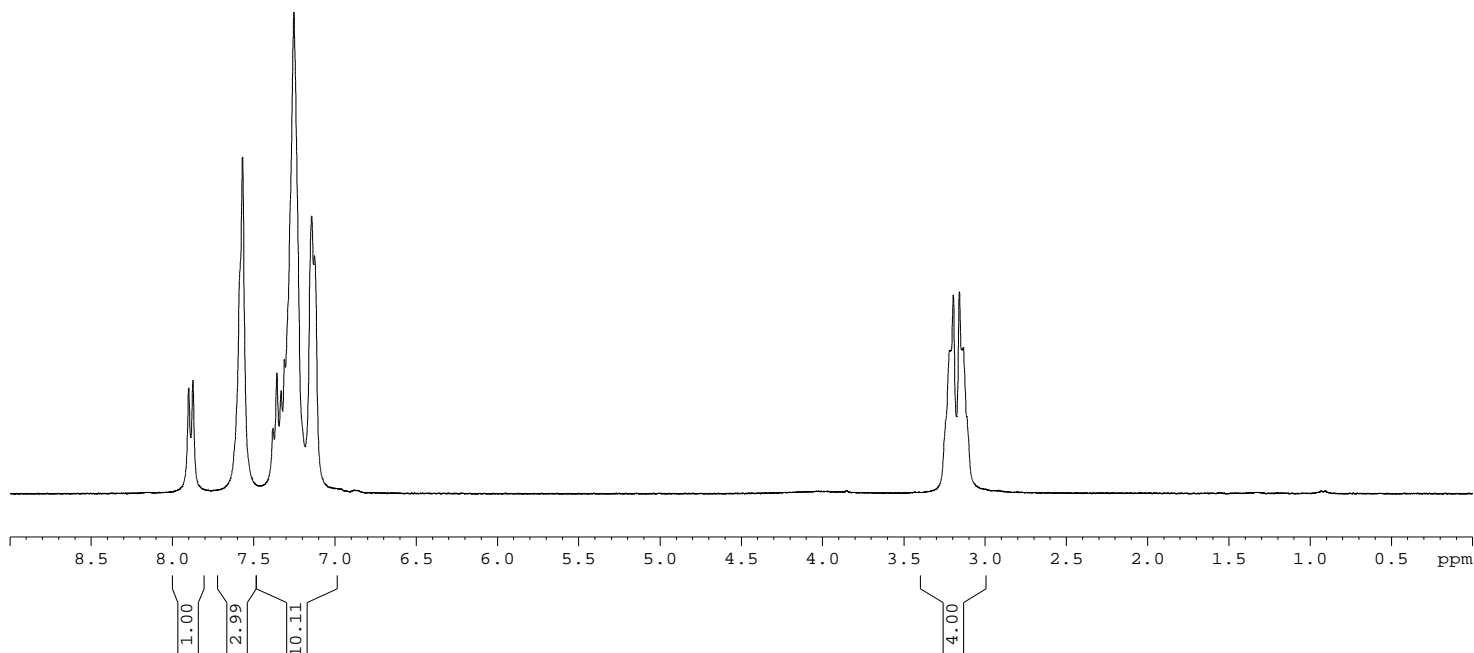

Proton-decoupled carbon NMR spectrum

154.32  
142.16  
140.78  
136.40  
135.68  
129.95  
129.03  
128.55  
128.43  
127.41  
126.32  
122.65  
119.08  
110.16

77.51  
77.09  
76.66

34.21  
29.82

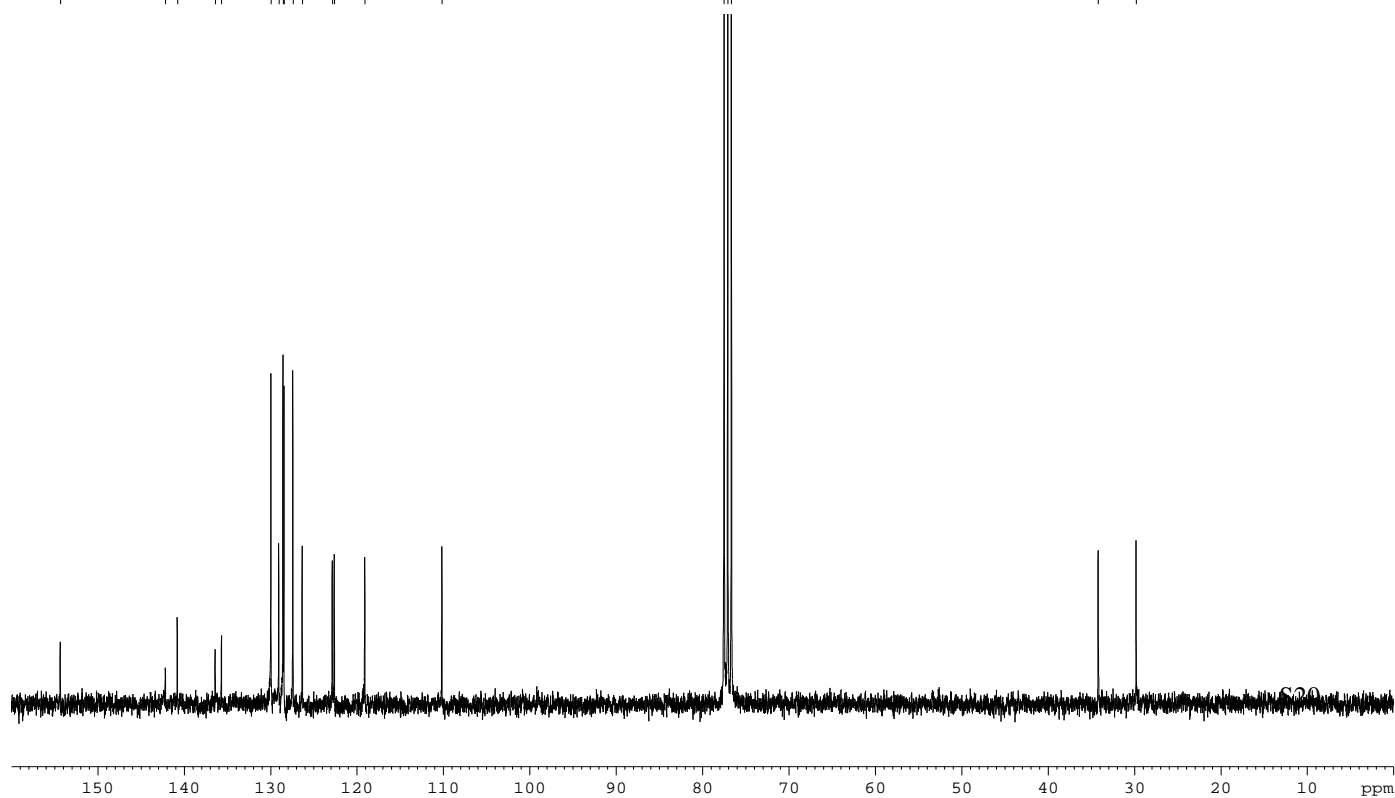

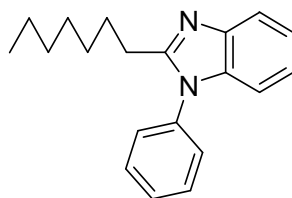

4p

1D proton NMR spectrum

7.84  
7.81  
7.58  
7.56  
7.37  
7.35  
7.31  
7.28  
7.26  
7.22  
7.19  
7.17  
7.12  
7.09

2.83  
2.80  
2.78

1.86  
1.84  
1.82  
1.79  
1.76

1.31  
1.28  
1.25

0.89  
0.87  
0.85

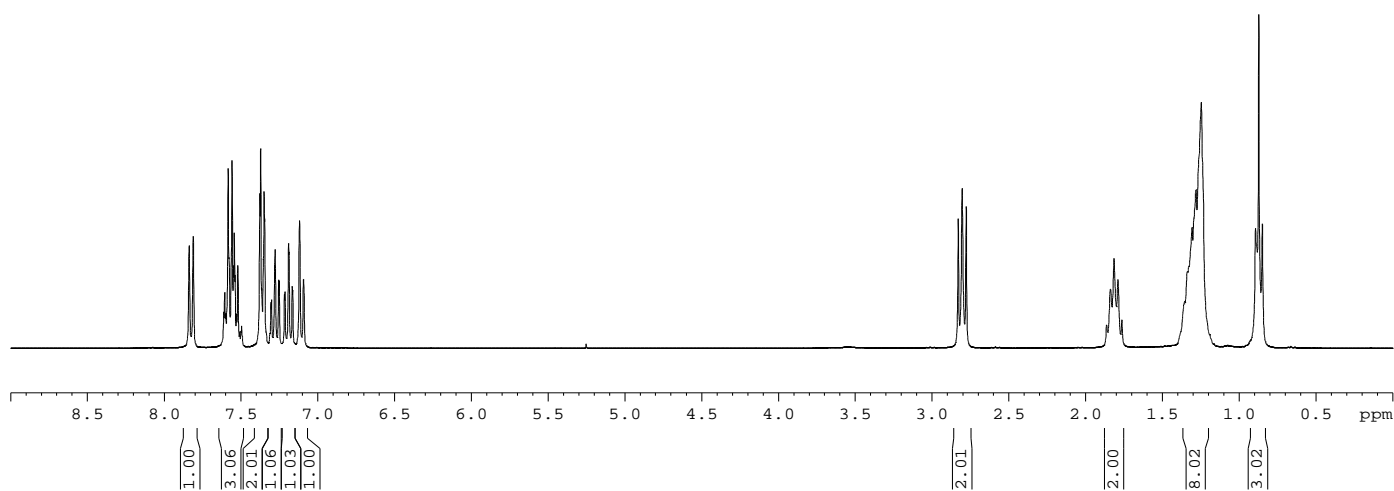

Proton-decoupled carbon NMR spectrum

155.39  
142.65  
136.55  
136.08  
129.91  
128.96  
127.37  
122.50  
122.29  
119.11  
109.94

77.68  
77.25  
76.83

31.63  
29.29  
28.88  
27.84  
27.75  
22.61

14.11

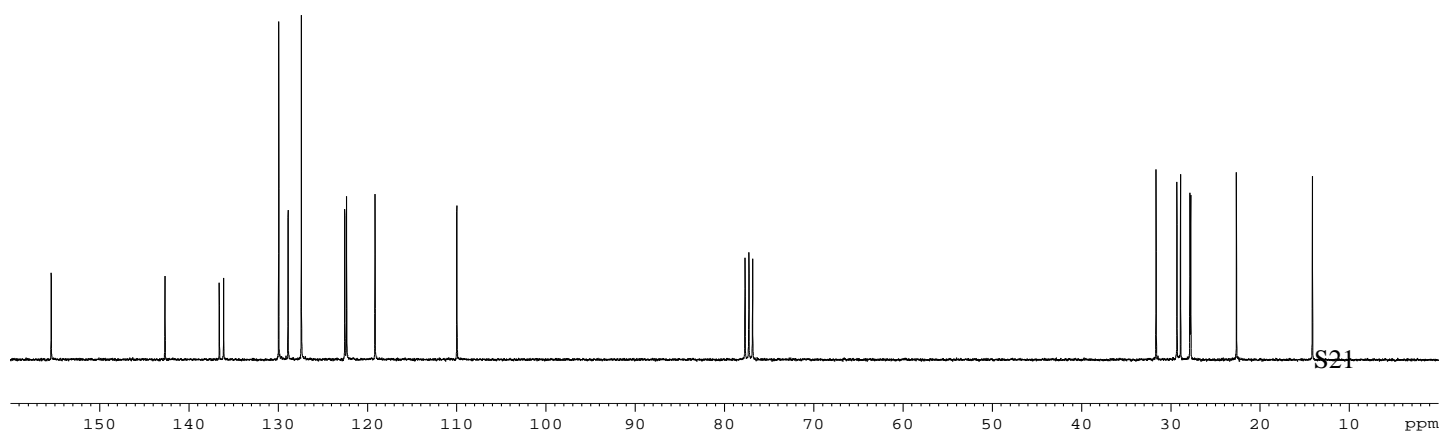

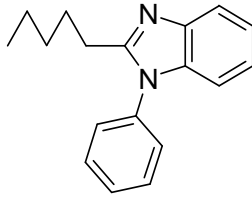

1D proton NMR spectrum

4q

7.83  
7.80  
7.56  
7.54  
7.52  
7.35  
7.33  
7.29  
7.26  
7.24  
7.20  
7.17  
7.15  
7.10  
7.07

2.81  
2.79  
2.76

1.83  
1.81  
1.78

1.30  
1.29  
1.28

0.87  
0.85  
0.83

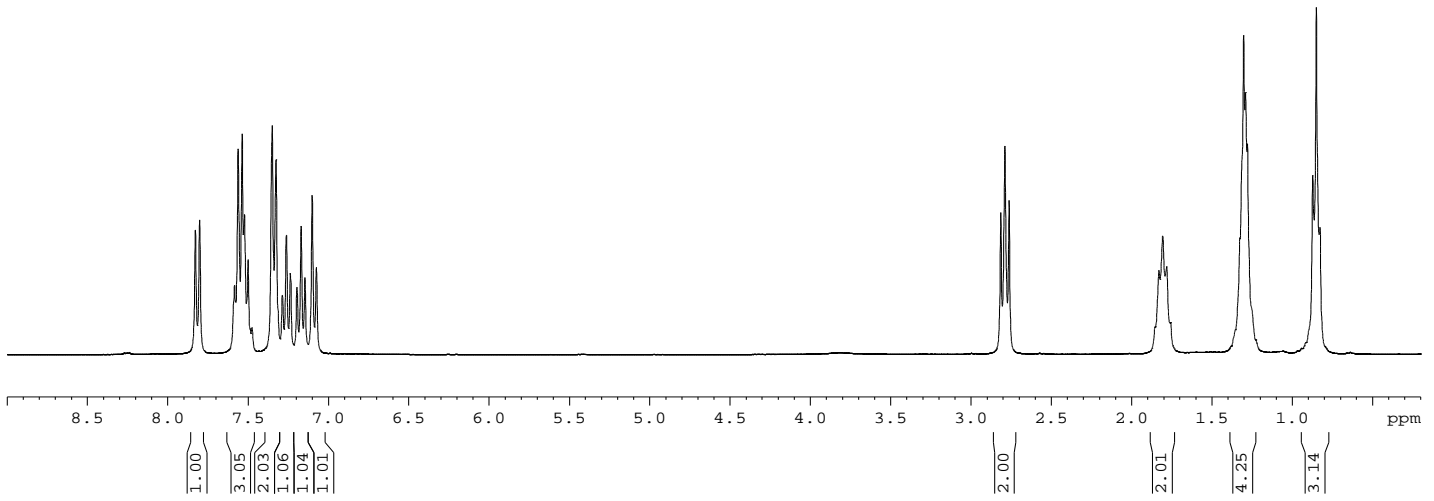

Proton-decoupled carbon NMR spectrum

155.36  
142.60  
136.54  
136.04  
129.91  
128.86  
127.34  
122.52  
122.29  
119.09  
109.94

77.73  
77.31  
76.88

31.50  
27.70  
27.51  
22.29

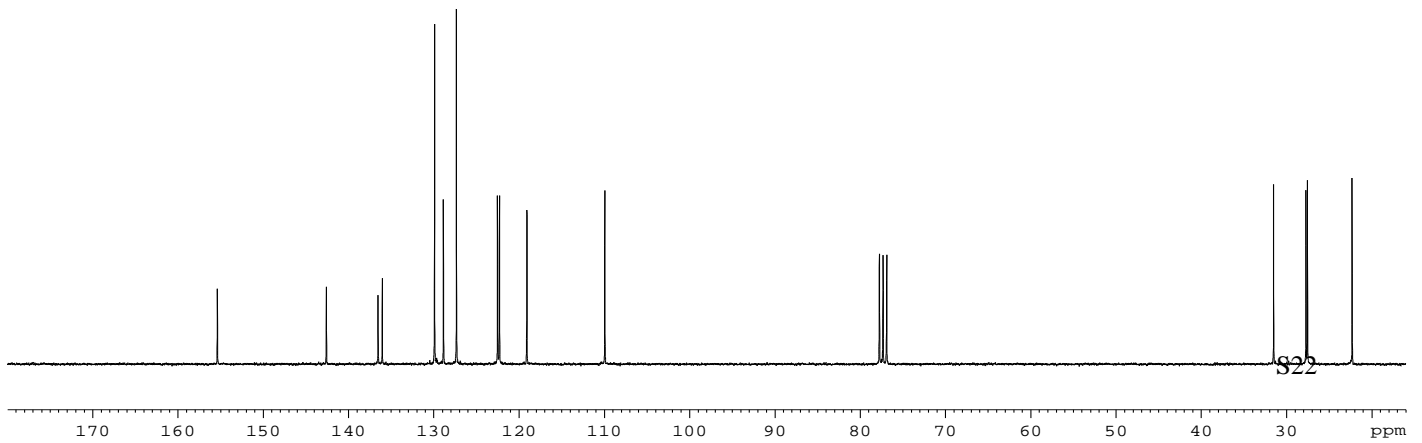

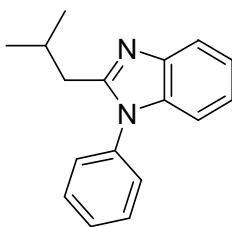

4r

1D proton NMR spectrum

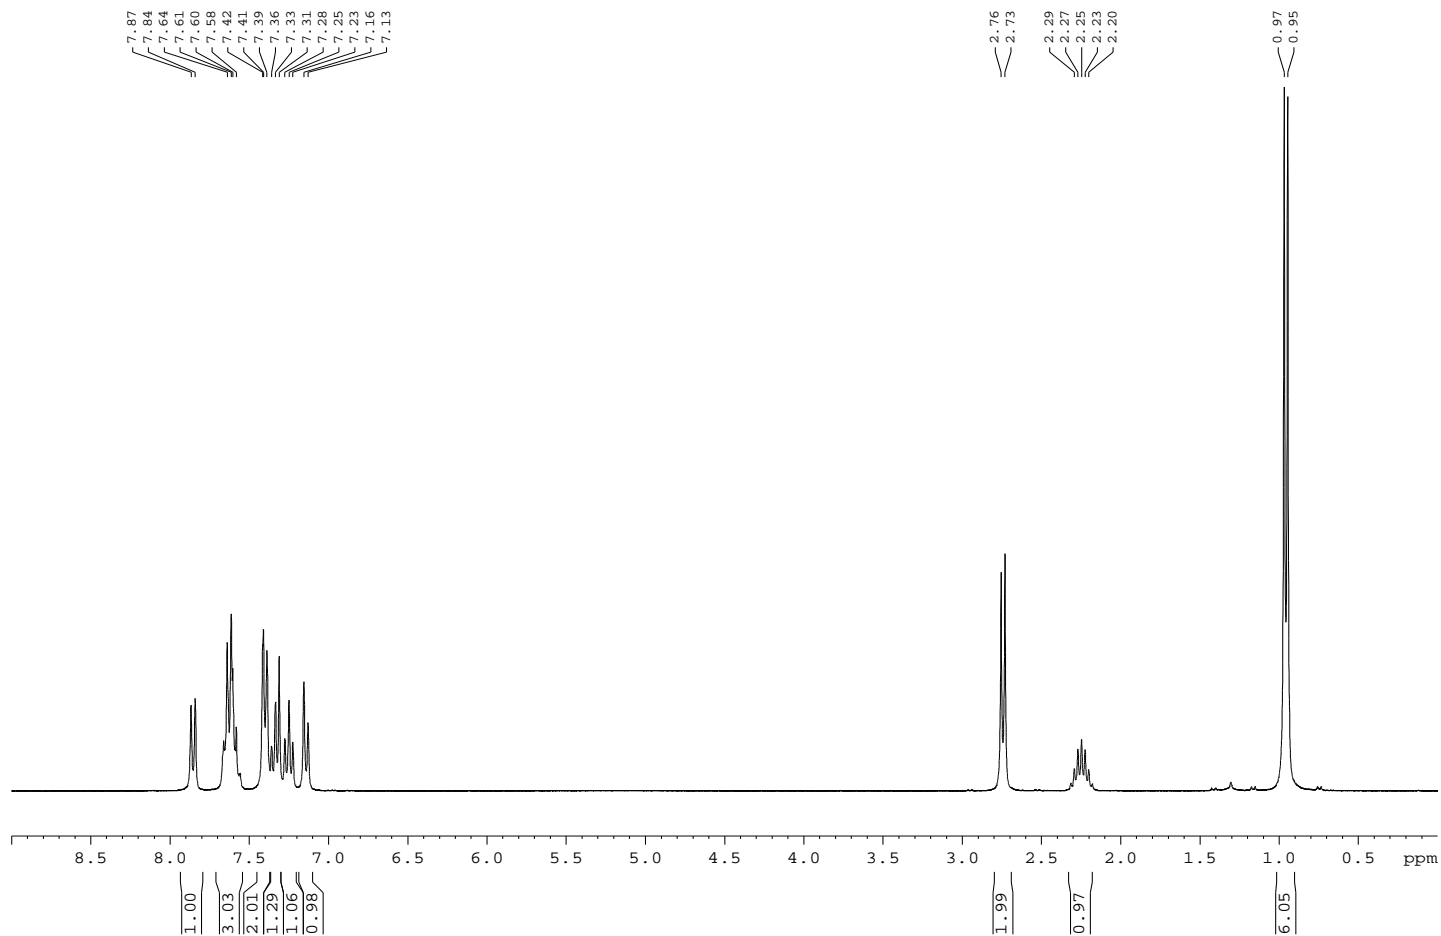

Proton-decoupled carbon NMR spectrum

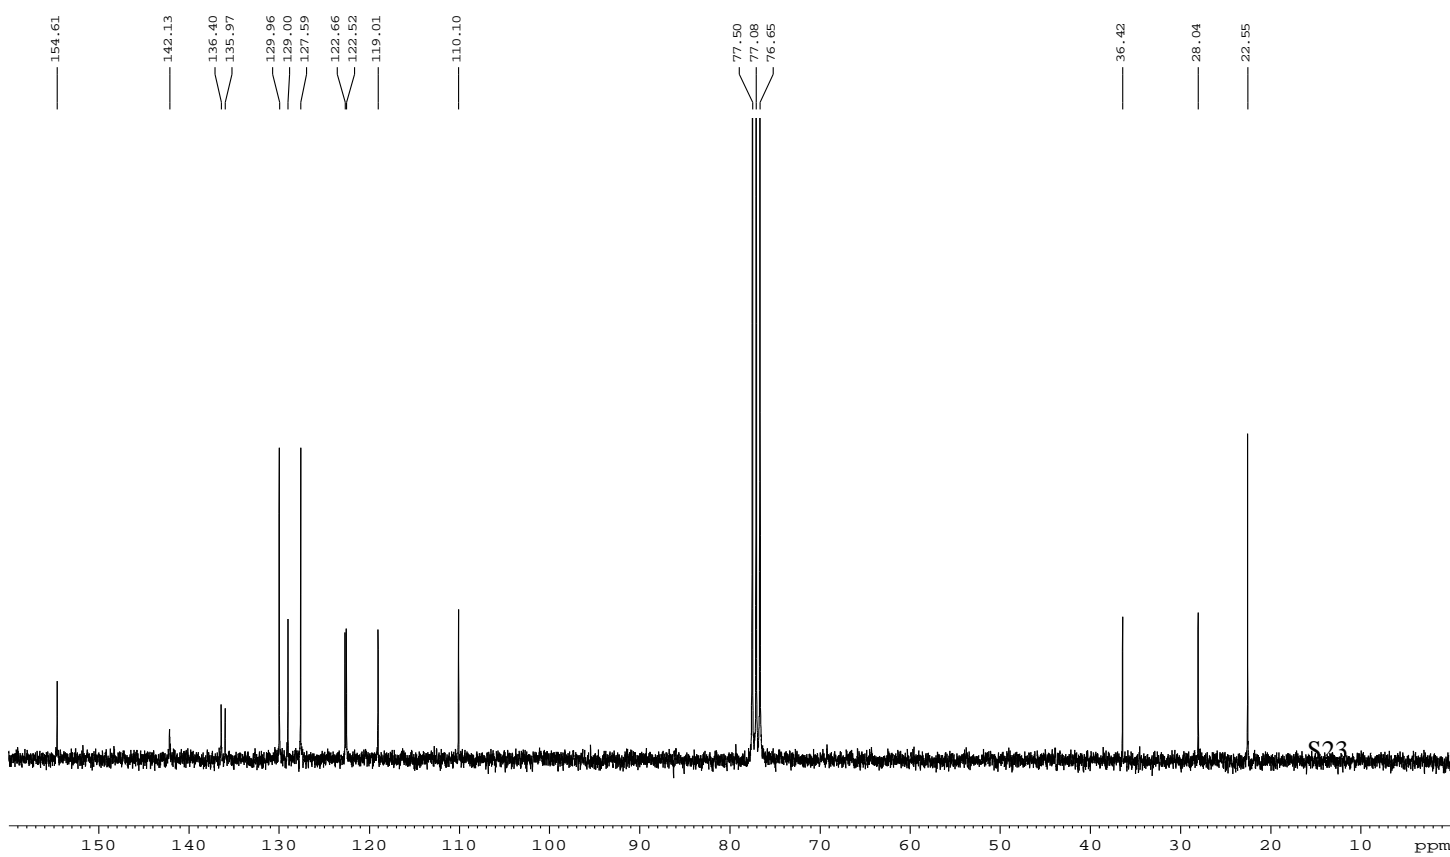



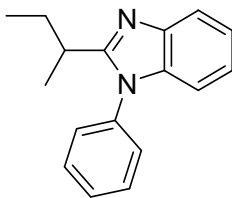

**4s**

1D proton NMR spectrum

7.88  
7.85  
7.61  
7.59  
7.58  
7.38  
7.36  
7.33  
7.33  
7.31  
7.30  
7.28  
7.28  
7.24  
7.23  
7.21  
7.21  
7.19  
7.18  
7.11  
7.11  
7.11  
7.08  
7.08

2.92  
2.90  
2.87  
2.85  
2.04  
2.02  
2.00  
1.99  
1.97  
1.95  
1.76  
1.74  
1.73  
1.71  
1.69  
1.67  
1.41  
1.38  
0.89  
0.86  
0.84

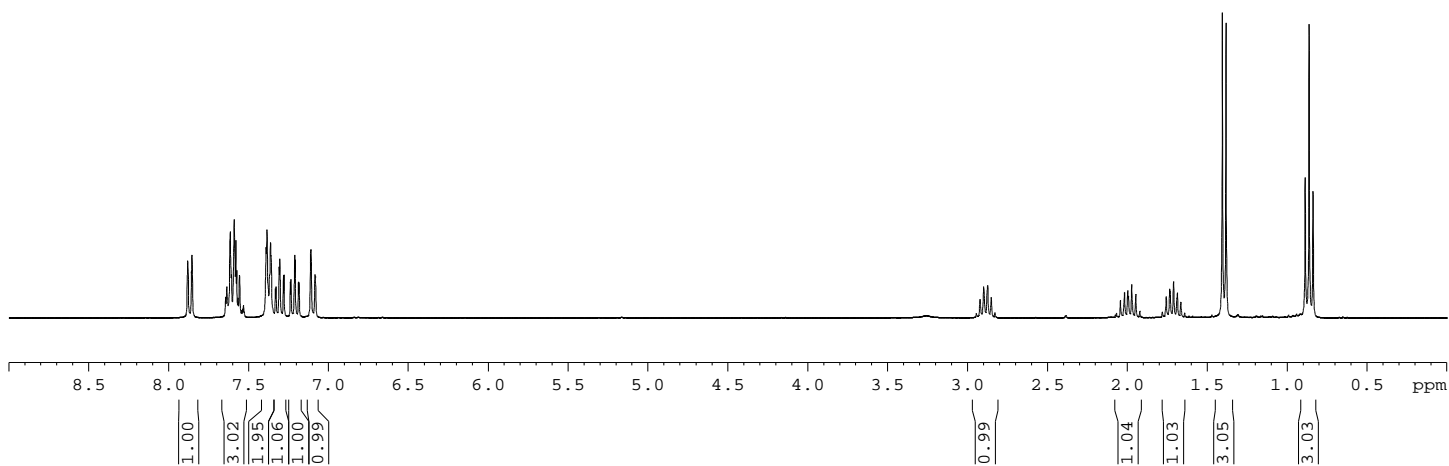

Proton-decoupled carbon NMR spectrum

159.52  
142.65  
136.43  
136.04  
129.95  
128.99  
127.82  
122.43  
122.30  
119.19  
110.08  
77.61  
77.19  
76.77  
33.41  
29.30  
20.04  
12.14

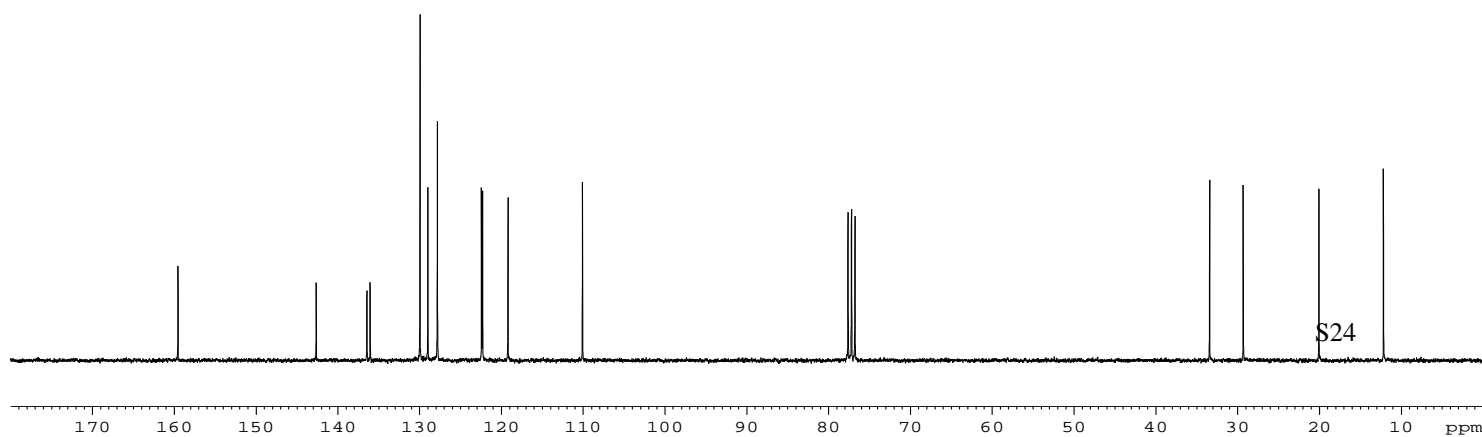

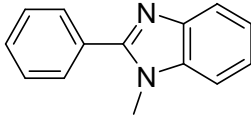

1D proton NMR spectrum

4t

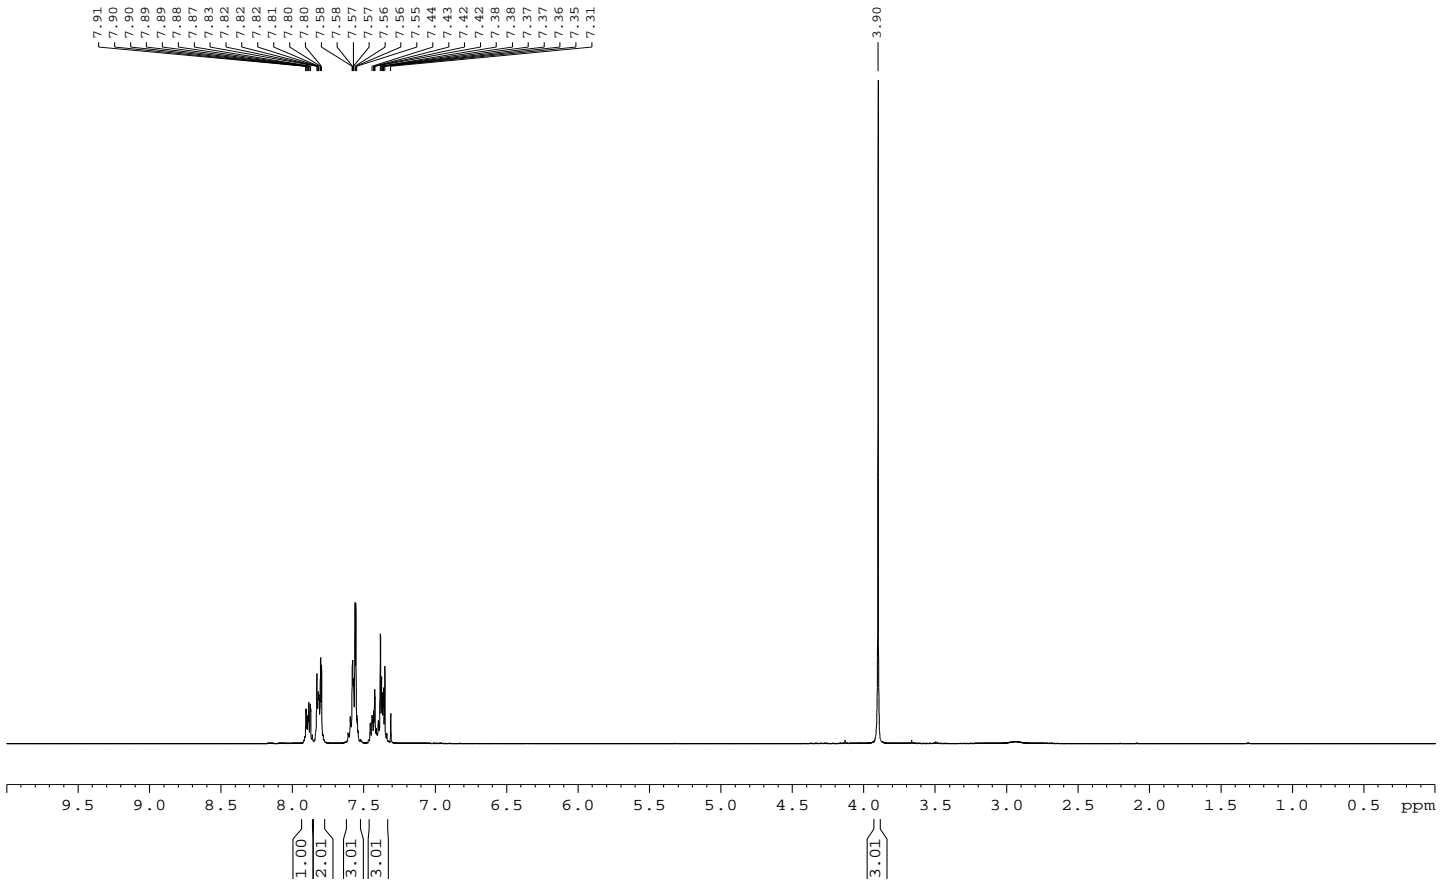

Proton-decoupled carbon NMR spectrum

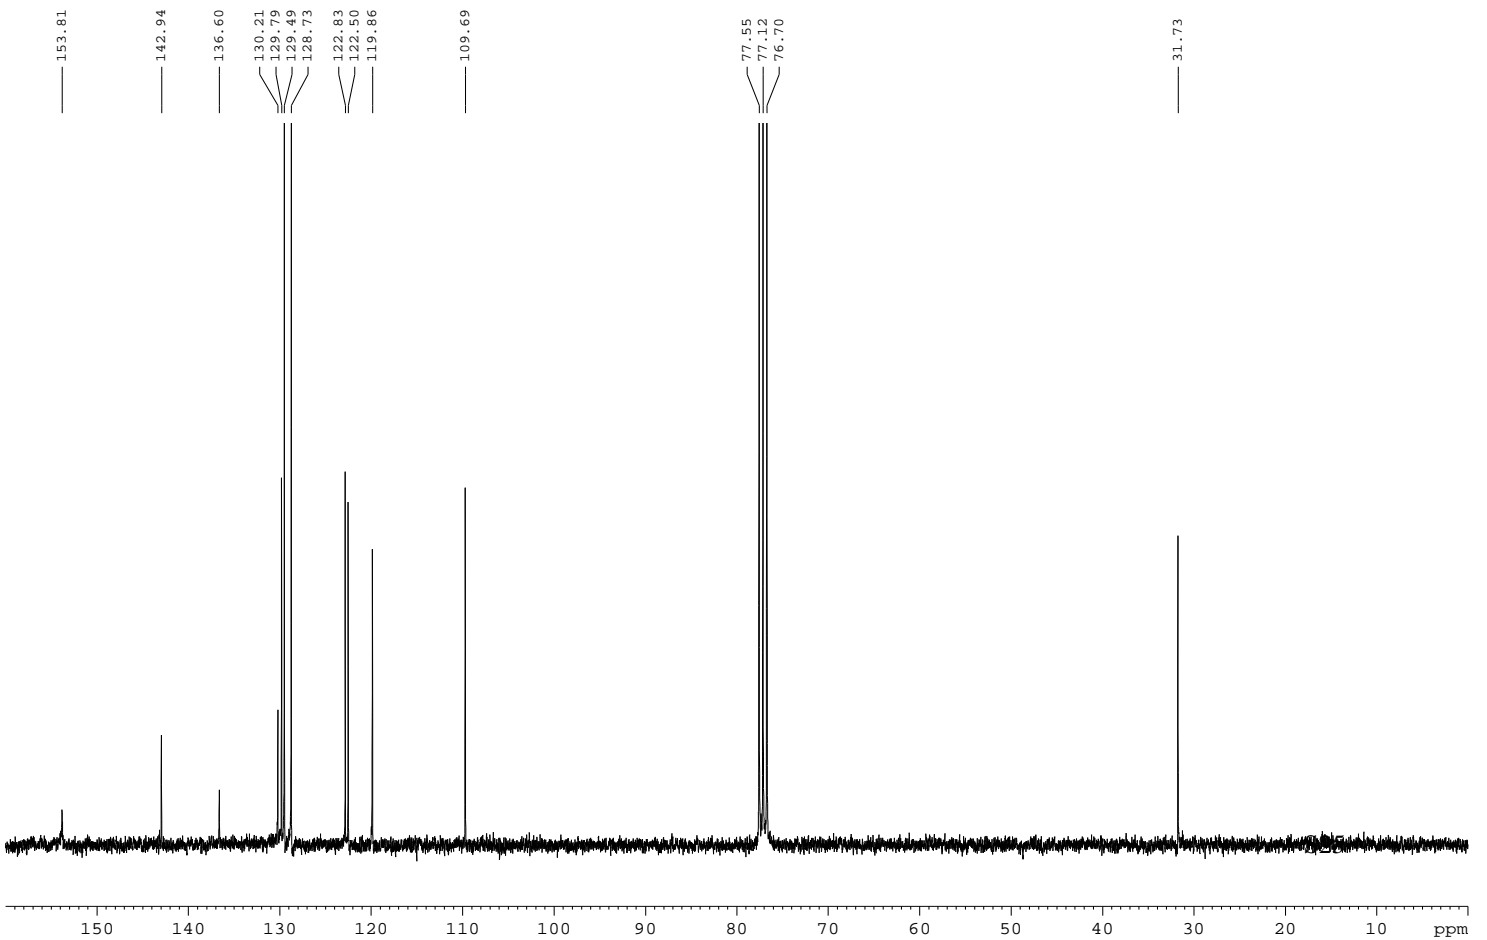

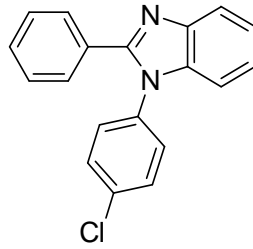

**4u**

1D proton NMR spectrum

7.95  
7.93  
7.61  
7.58  
7.50  
7.47  
7.40  
7.37  
7.35  
7.32  
7.29  
7.26  
7.23

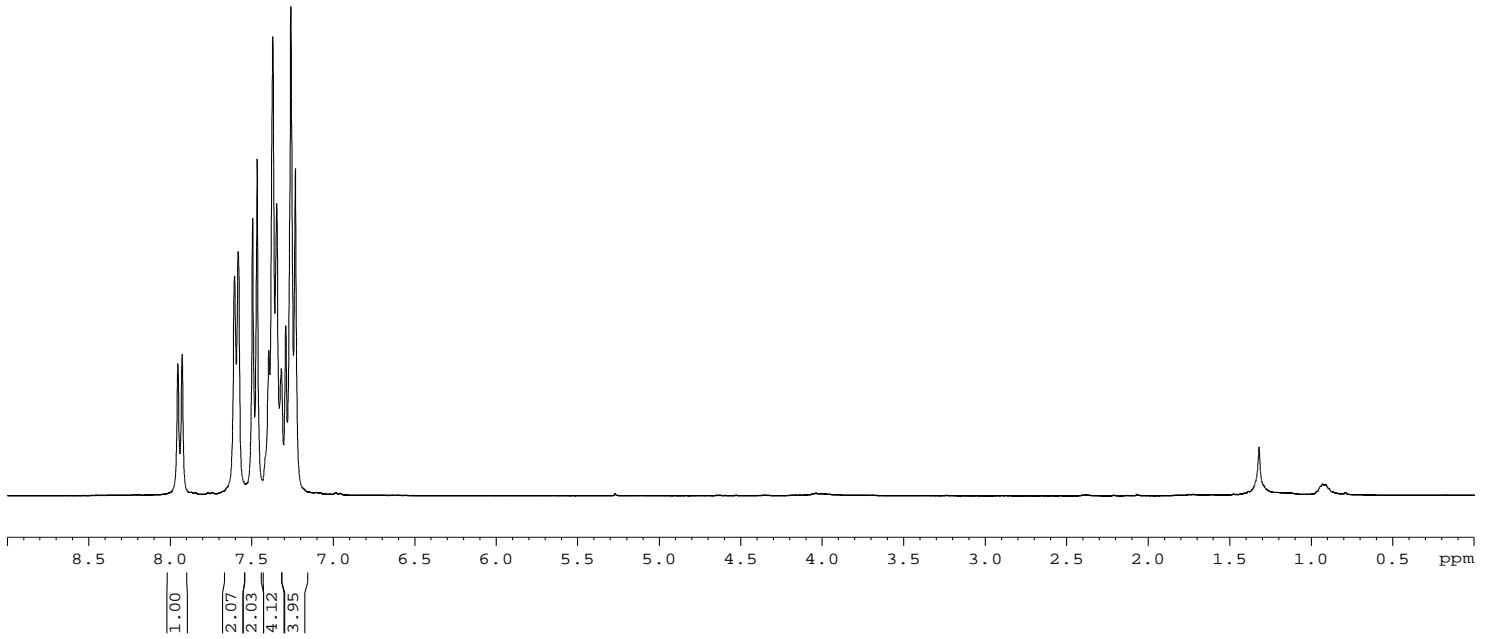

Proton-decoupled carbon NMR spectrum

152.26  
143.00  
136.95  
135.51  
134.41  
130.17  
129.70  
129.64  
129.49  
128.66  
128.51  
123.63  
123.29  
120.03  
110.27

77.68  
77.26  
76.83

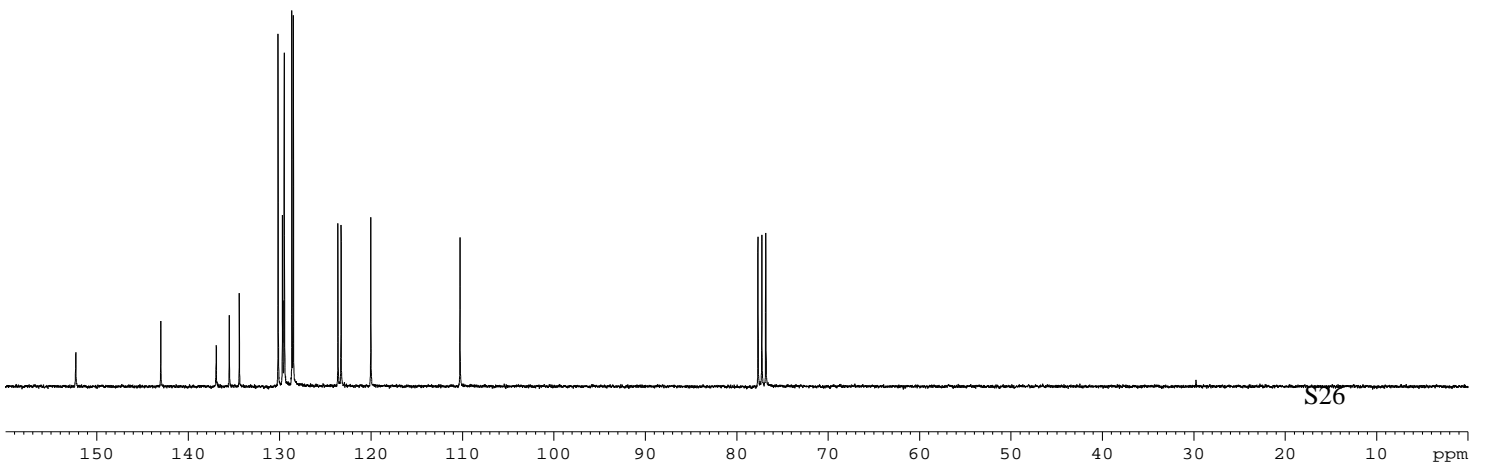

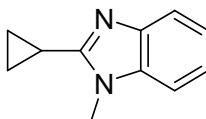

4v

### 1D proton NMR spectrum

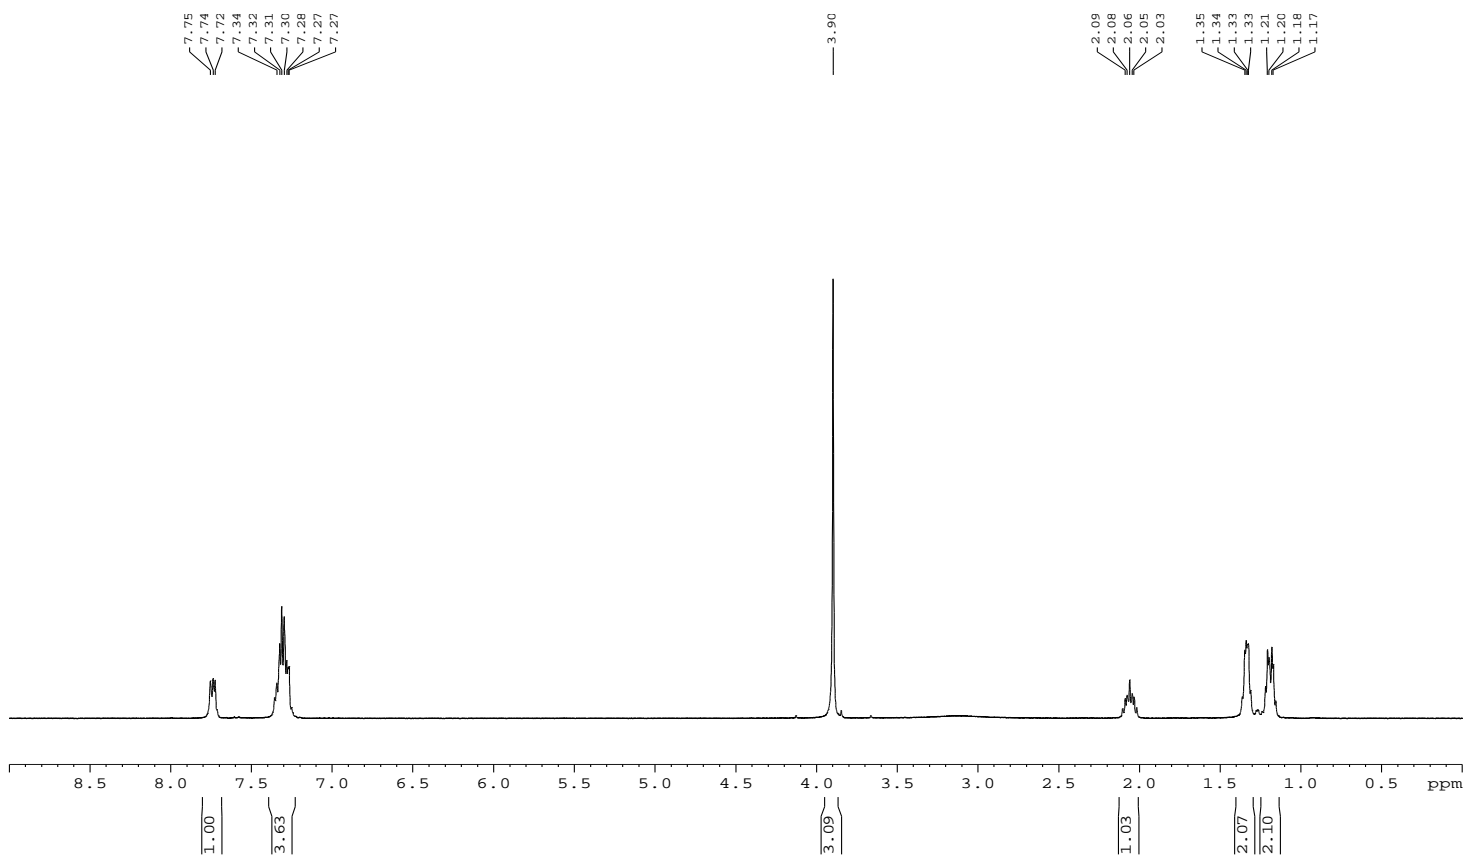

### Proton-decoupled carbon NMR spectrum

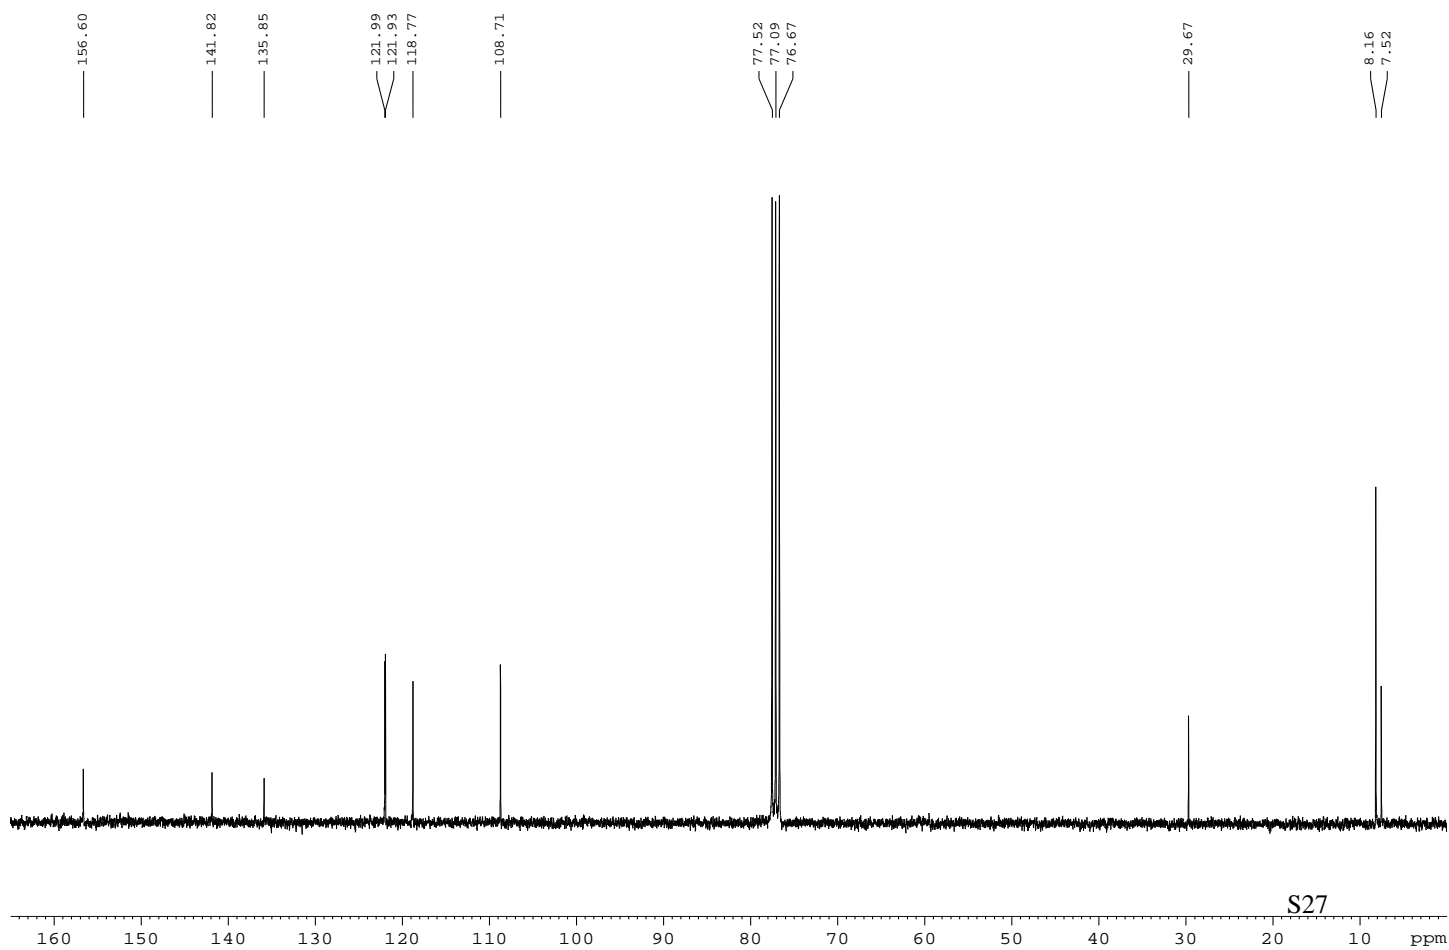

1D proton NMR spectrum

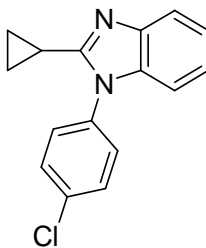

4w

7.76  
7.73  
7.70  
7.67  
7.66  
7.63  
7.60  
7.58  
7.55  
7.52  
7.50  
7.47  
7.45  
7.42  
7.39  
7.36  
7.35  
7.32  
7.29  
7.26  
7.23  
7.20  
7.17  
7.15  
7.12

1.87  
1.86  
1.84  
1.83  
1.82  
1.39  
1.38  
1.37  
1.36  
1.36  
1.34  
1.10  
1.09  
1.08  
1.06  
1.05  
1.04

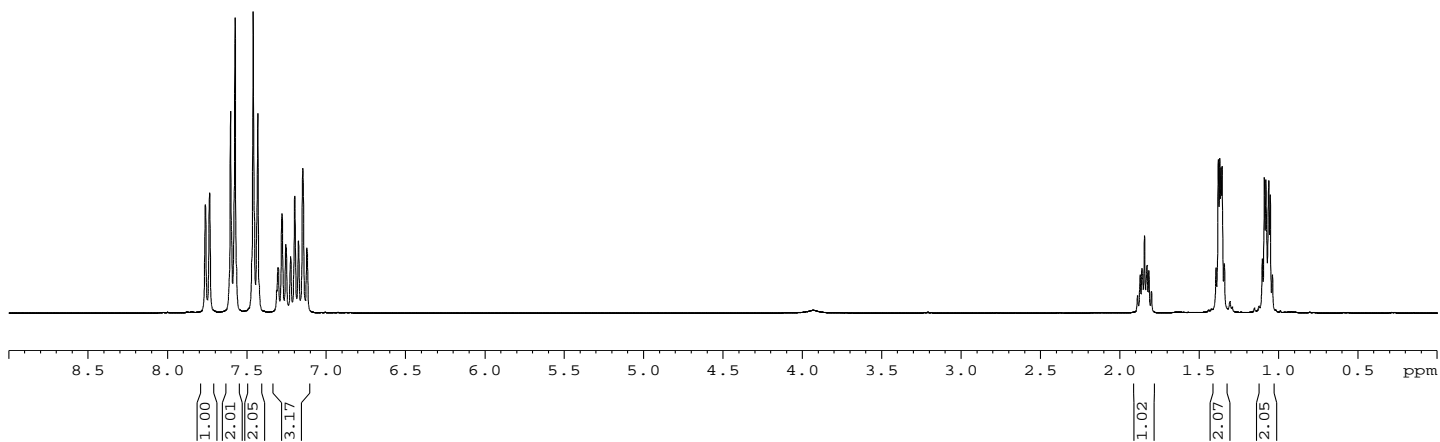

Proton-decoupled carbon NMR spectrum

156.65  
142.45  
136.30  
134.55  
134.52  
130.14  
128.63  
122.65  
122.46  
118.96  
109.45

77.64  
77.22  
76.79

9.65  
8.26

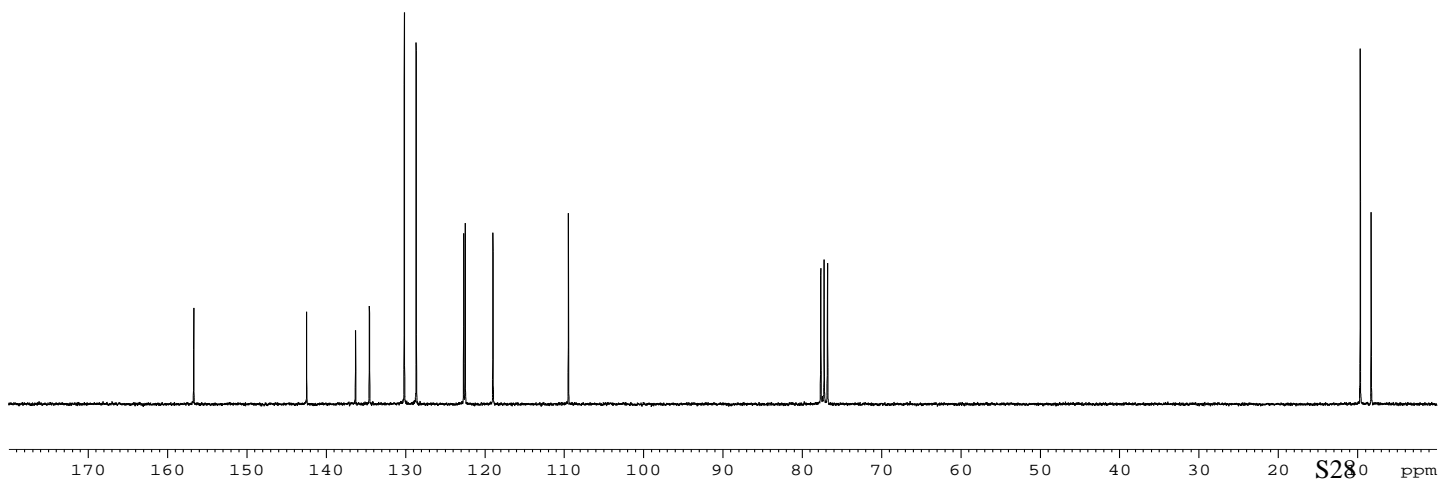

Supplement: chem0021-12606-sd1.pdf [file chem0021-12606-sd1.pdf]
